# Supplementary material for: Metabolic re-patterning in COPD airway smooth muscle cells
Source: PubMed Central journal article supplement — Eur Respir J. 2017 Nov 30;50(5):1700202. doi: 10.1183/13993003.00202-2017 (PMC5725208; doi:10.1183/13993003.00202-2017), 2017-11-30
Supplement: ERJ-00202-2017_Supplement.pdf [file ERJ-00202-2017_Supplement.pdf]

**ONLINE SUPPLEMENT**

1  
2  
3  
4  
5  
6  
7  
8  
9  
10  
11  
12  
13  
14  
15  
16  
17  
18  
19  
20  
21  
22  
23  
24  
25  
26  
27

**Metabolic re-patterning in chronic obstructive pulmonary disease airway smooth  
muscle cells**

Charalambos Michaeloudes, Chih-Hsi Kuo, Gulam Haji, Donna K Finch, Andrew J Halayko,  
Paul Kirkham, Kian Fan Chung and Ian M Adcock on behalf of COPDMAP

## 28 **MATERIALS AND METHODS**

### 29 **Reagents**

30 2-deoxy-D-glucose was purchased from Sigma Aldrich (Dorset, UK) and buthionine  
31 sulfoximine (BSO) from Cayman Chemicals (Ann Arbor, MI, USA).

### 32 **ASMC isolation and culture**

33 ASMCs were isolated from biopsies or resected airways of healthy non-smoker and healthy  
34 smoker subjects, and patients with COPD (Table 1).

35         The bronchoscopic procedures were performed under a research protocol approved by  
36 the local Ethics Committee and all participating subjects gave informed signed consent. The  
37 healthy subjects volunteered to take part in the study and were reimbursed for their  
38 participation. The amount of reimbursement for their travel and time was agreed with the  
39 Ethics Committee that approved the study. Biopsies were divided into small pieces of less  
40 than 1mm<sup>2</sup> and then transferred to empty 6-well tissue culture plates pre-coated with cell  
41 culture medium containing 10% fetal bovine serum (FBS). The tissue pieces were incubated  
42 in Dulbecco's Modified Eagles Medium (DMEM) supplemented with 4mM L-glutamine,  
43 100U/ml of penicillin, 100µg/ml streptomycin, 2.5µg/ml amphotericin B and 10% FBS, at  
44 37<sup>0</sup>C, 5% CO<sub>2</sub> and humidified atmosphere, to allow attachment and growth of ASMCs.

45 ASMCs were also isolated from macroscopically healthy sections of main bronchi resected  
46 from surgical patients as described previously [1-3]. Specimens were collected from subjects  
47 who provided informed consent in accordance with protocols approved by the Human  
48 Research Ethics Board of the University of Manitoba, Winnipeg, Canada. Briefly, primary  
49 human ASMCs were isolated from macroscopically healthy segments of second- to -fourth  
50 generation bronchi obtained after lung resection surgery from patients with a diagnosis of

51 adenocarcinoma. Cells were plated on uncoated plastic dishes in DMEM supplemented with  
52 50U/ml streptomycin, 50µg/ml penicillin, and 10% FBS.

53 ASMC phenotype was confirmed by observing the characteristic “hill and valley”  
54 morphology under a light microscope. Cells between passages 3 and 6 were used for  
55 experimentation. Prior to treatment, cells were serum-starved in medium containing phenol-  
56 free DMEM supplemented with 1mM sodium pyruvate, 4mM L-glutamine, 1:100 non-  
57 essential amino acids, 0.1% bovine serum albumin (BSA) and antibiotics as described above.

58

### 59 **Untargeted metabolomics analysis**

60 ASMCs were seeded in 75cm<sup>2</sup> flasks and at approximately 80% confluence were serum-  
61 starved overnight. After treatment cells were detached by trypsinisation and pelleted by  
62 centrifugation at 1500 rpm for 5 mins. Cells were re-suspended in FBS-containing medium  
63 and counted. 2x10<sup>6</sup> cells were transferred to cryovials, pelleted and snap-frozen on dry ice.  
64 Samples were stored at -80°C until processed. Sample preparation and analysis using ultra-  
65 high performance liquid chromatography-mass spectrometry (UHPLC-MS) and gas  
66 chromatography-MS (GC-MS) was performed by Metabolon Inc. (Durham NC, USA) as  
67 described previously[4;5]. Using both UHPLC-MS and GC-MS enabled detection of a  
68 greater range of metabolites.

69

### 70 **Determination of differentially-expressed metabolites**

71 Data pre-processing and normalization was performed by Metabolon Inc. Data are presented  
72 as “scaled intensity” which represents the concentration of a specific metabolite normalised  
73 to the total protein concentration of the lysate, determined by Bradford assay, and then scaled  
74 so that the median for the specific metabolite across all sample groups is equal to one.  
75 Missing values were imputed with the minimum observed value. Differential expression

76 analysis was performed by fitting a linear model of the scaled intensity with phenotype and  
77 batch/technical effect as covariates, using the Bioconductor R package limma. Differentially-  
78 expressed metabolites were filtered by nominal p-value <0.05 and 50% increase in the scaled  
79 intensity.

80

### 81 **Supervised learning algorithm for phenotype classification**

82 The nearest shrunken centroid method was used as a machine learning algorithm to further  
83 define the optimal number of metabolites that best differentiated the phenotypes, as  
84 previously described[6]. Using this method many differentially-expressed metabolites are  
85 eliminated from phenotype prediction leaving a sparse model, a set of surviving  
86 differentially-expressed metabolites, which is representative of each phenotype. Briefly, the  
87 mean (centroid) of each metabolite within each group as well as across all groups was  
88 calculated. Standardization of the centroids of each group was performed through dividing  
89 the difference of the group centroids and overall centroids by the within-group standard  
90 deviation of each metabolite. This standardized value was treated as an absolute value which  
91 was subsequently shrunken by an amount  $\Delta$  (threshold value). If the value of a given  
92 standardized centroid was shrunken to zero by  $\Delta$  for all groups, then this metabolite did not  
93 contribute to the nearest-centroid classification. Otherwise, a non-zero value of a  
94 standardized centroid after shrinkage was retained as a centroid classifier for the given group.  
95 The inherent property of this method is that metabolites will be eliminated from group  
96 prediction as  $\Delta$  increases. Given that each amount of  $\Delta$  shrunken will result in a set of  
97 surviving centroids for each group, the amount of shrinkage is chosen by iterative cross-  
98 validation on the performance of which each set of surviving centroids correctly predicts the  
99 group classification of each sample. This analysis was carried out using an algorithm  
100 available as free R software for prediction analysis of microarrays in The Comprehensive R

101 Archive Networks (CRAN-pamr package). The identified sparse model was further adjusted  
102 for sex and age using the R package Surrogate Variable Analysis in Bioconductor where  
103 principle component analysis (PCA) was later applied to inspect the phenotype boundaries  
104 along the first and second principal component coordinates.

105

### 106 **Pathway analysis**

107 The Pathway Activity Profiling (PAPi) algorithm was used to quantify the activity of  
108 metabolic pathways using the KEGG database. Briefly, all KEGG pathways to which  
109 metabolites from the database were mapped to were selected. Each pathway was then  
110 summarised as an activity score for each sample, based on the abundance of the metabolites  
111 that link to it, thus enabling conventional statistical tests between the groups. The algorithm is  
112 available as a Bioconductor R package and described in detail elsewhere[7].

113

### 114 **Determination of mitochondrial ROS levels**

115 Mitochondrial ROS levels were determined using the mitochondrial-targeted, redox-sensitive  
116 fluorescent probe MitoSOX Red (Invitrogen, Paisley, UK). Following treatment, ASMCs  
117 were washed with Hank's Balanced Salt Solution (HBSS) containing calcium and magnesium  
118 (Sigma-Aldrich, Dorset, UK) and incubated for 30 mins with a 5µM MitoSOX Red solution  
119 prepared in the same buffer. ASMCs were then washed using HBSS, detached using  
120 Accutase (Sigma-Aldrich) and pelleted by centrifugation at 1500 rpm for 5mins. Cells pellets  
121 were re-suspended in HBSS and the median fluorescence intensity (MFI) was determined by  
122 flow cytometry.

123

124

125

126 **Measurement of mRNA expression**

127 Total RNA was isolated using an RNeasy Mini Kit (Qiagen, West Sussex, UK) and reverse-  
128 transcribed into cDNA using random primers and AMV reverse transcriptase (Promega,  
129 Southampton, UK). mRNA was quantified by real-time PCR (Rotor Gene 6000; Qiagen)  
130 using SYBR Green PCR Master Mix Reagent and normalised to 18S rRNA expression. The  
131 primers used were:

132  $\alpha$ -SMA (ACTA2), forward 5'-TTCAATGTCCCAGCCATGTA-3' and  
133 reverse 5'-GAAGGAATAGCCACGCTCAG-3' [8];  
134 PDK1, forward 5'-GTCGCCACTCTCCATGAAG-3' and  
135 reverse 5'-TGGGGTCCTGAGAAGATTATC-R';  
136 LDHA, forward 5'-GGCCTGTGCCATCAGTATCT-3' and  
137 reverse 5'-GGAGATCCATCATCTCTCCC-3' [9],  
138 18S rRNA, forward 5'-CTTAGAGGGACAAGTGGCG-3' and  
139 reverse 5'-ACGCTGAGCCAGTCAGTGTA -3'.

140 QuantiTect primer assays (Qiagen) were used for PGC-1 $\alpha$  (Hs\_PPARGC1A\_1\_SG;  
141 QT00095578) and PGC-1 $\beta$  (Hs\_PPARGC1B\_1\_SG; QT00081865).

142

143

144  
145  
146  
147  
148  
149  
150  
151  
152  
153  
154  
155  
156  
157  
158  
159  
160  
161  
162  
163  
164  
165  
166  
167  
168  
169  
170  
171  
172  
173

Reference List

1. Gosens R, Stelmack GL, Dueck G, Mutawe MM, Hinton M, McNeill KD, Paulson A, Dakshinamurti S, Gerthoffer WT, Thliveris JA, Unruh H, Zaagsma J, Halayko AJ: **Caveolae facilitate muscarinic receptor-mediated intracellular Ca<sup>2+</sup> mobilization and contraction in airway smooth muscle.** *Am J Physiol Lung Cell Mol.Physiol* 2007, **293**:L1406-L1418.
2. Tran T, Ens-Blackie K, Rector ES, Stelmack GL, McNeill KD, Tarone G, Gerthoffer WT, Unruh H, Halayko AJ: **Laminin-binding integrin alpha7 is required for contractile phenotype expression by human airway myocytes.** *Am J Respir.Cell Mol.Biol.* 2007, **37**:668-680.
3. Sharma P, Tran T, Stelmack GL, McNeill K, Gosens R, Mutawe MM, Unruh H, Gerthoffer WT, Halayko AJ: **Expression of the dystrophin-glycoprotein complex is a marker for human airway smooth muscle phenotype maturation.** *Am J Physiol Lung Cell Mol.Physiol* 2008, **294**:L57-L68.
4. Fessel JP, Hamid R, Wittmann BM, Robinson LJ, Blackwell T, Tada Y, Tanabe N, Tatsumi K, Hemnes AR, West JD: **Metabolomic analysis of bone morphogenetic protein receptor type 2 mutations in human pulmonary endothelium reveals widespread metabolic reprogramming.** *Pulm.Circ.* 2012, **2**:201-213.
5. Reitman ZJ, Jin G, Karoly ED, Spasojevic I, Yang J, Kinzler KW, He Y, Bigner DD, Vogelstein B, Yan H: **Profiling the effects of isocitrate dehydrogenase 1 and 2 mutations on the cellular metabolome.** *Proc.Natl.Acad.Sci.U.S.A* 2011, **108**:3270-3275.
6. Tibshirani R, Hastie T, Narasimhan B, Chu G: **Diagnosis of multiple cancer types by shrunken centroids of gene expression.** *Proc.Natl.Acad.Sci.U.S.A* 2002, **99**:6567-6572.
7. Aggio RB, Ruggiero K, Villas-Boas SG: **Pathway Activity Profiling (PAPi): from the metabolite profile to the metabolic pathway activity.** *Bioinformatics.* 2010, **26**:2969-2976.
8. Roach KM, Feghali-Bostwick C, Wulff H, Amrani Y, Bradding P: **Human lung myofibroblast TGFbeta1-dependent Smad2/3 signalling is Ca(2+)-dependent and regulated by KCa3.1 K(+) channels.** *Fibrogenesis.Tissue Repair* 2015, **8**:5.
9. Liang J, Cao R, Zhang Y, Xia Y, Zheng Y, Li X, Wang L, Yang W, Lu Z: **PKM2 dephosphorylation by Cdc25A promotes the Warburg effect and tumorigenesis.** *Nat.Commun.* 2016, **7**:12431.

174

175 **FIGURE LEGENDS**

176 **Figure E1: Proliferation and  $\alpha$ -SMA mRNA expression in ASMCs from healthy**  
177 **smokers and COPD patients. (A-C)** ASMCs isolated from healthy smokers (n=7) and  
178 patients with COPD (n=6) were serum-starved overnight and incubated with TGF- $\beta$  (1ng/ml)  
179 and FBS (2.5%) for 4 or 6 days. The number of viable cells was determined by counting  
180 after trypan blue staining. Data are expressed as fold-change compared to untreated cells (A).  
181 The effect of TGF- $\beta$ /FBS on cell number was correlated to the % FEV<sub>1</sub> (B) and FEV<sub>1</sub>/FVC of  
182 the subjects using the Spearman's correlation coefficient (C). (D-E) ASMCs isolated from  
183 healthy smokers (n=7) and patients with COPD (n=7) were serum-starved overnight and  
184 incubated with TGF- $\beta$  (1ng/ml) and FBS (2.5%) for 24 hrs. Baseline  $\alpha$ -SMA (ACTA2)  
185 mRNA expression (D) and the effect of TGF- $\beta$  (1ng/ml) and FBS (2.5%) on ACTA2 mRNA  
186 expression (E) were compared between the two groups. Data are expressed as relative mRNA  
187 expression (D) and as fold-change compared to untreated cells (E). Bars represent mean  $\pm$   
188 SEM. In panel (D) the horizontal lines represent the median for each group. \* p<0.05. The clinical  
189 characteristics of the subjects that provided ASMCs for these experiments are provided in  
190 Supplementary Table E1.

191

192

193

194

195

196



Supplementary Figure E1

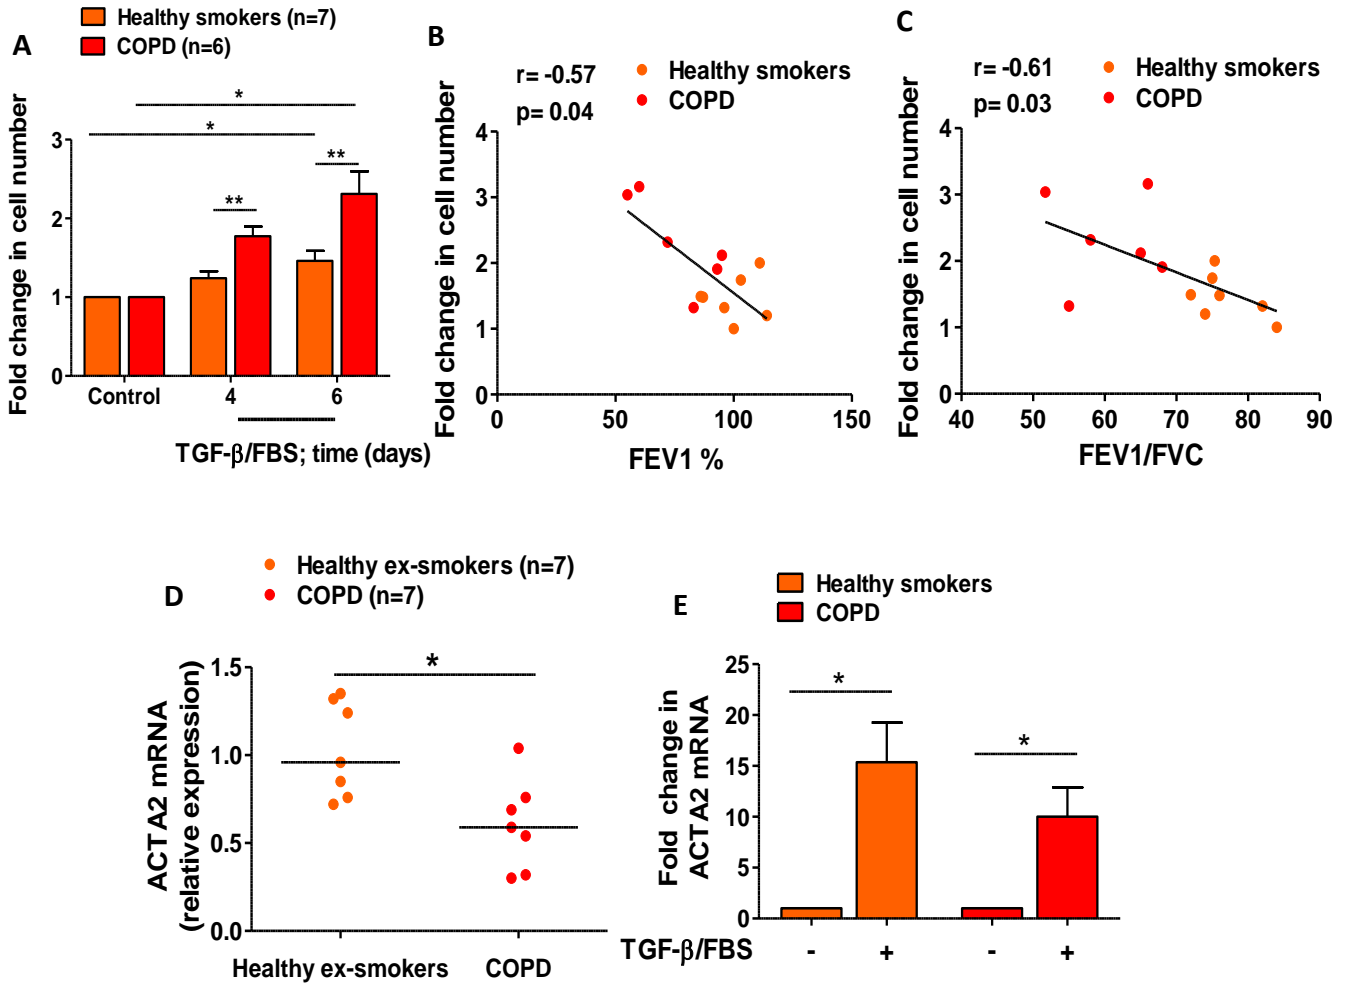

197 **Figure E2: Number of differentially-expressed metabolites between the study groups.**  
198 Venn diagrams showing the number of differentially-expressed metabolites between COPD  
199 ASMCs and healthy non-smoker and healthy smoker ASMCs, under unstimulated (**A**) and  
200 TGF- $\beta$ /FBS-stimulated (**B**) conditions.

201

202

203

204

205

206

207

208

209

210

211

212

213

214

215

Supplementary Figure E2

A

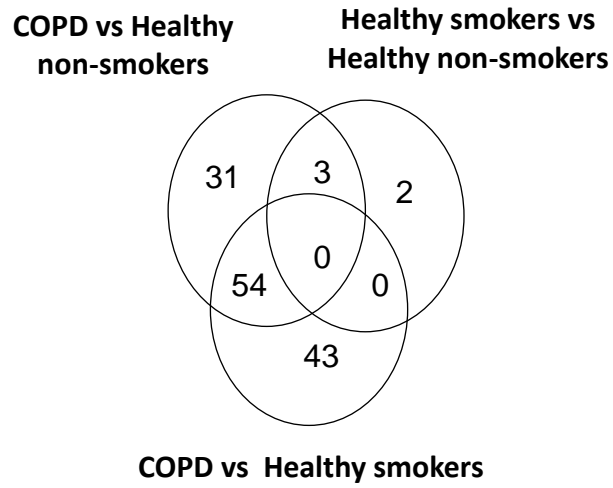

B

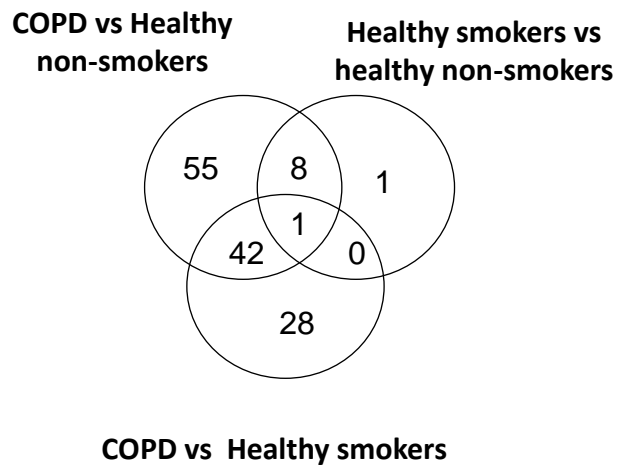

216 **Figure E3: Expression of key mitochondrial and glycolytic genes and the effect of**  
217 **glycolysis inhibition on TGF- $\beta$ /FBS-induced proliferation in healthy smoker and COPD**  
218 **ASMCs. (A-H)** ASMCs isolated from healthy smokers (n=7) and patients with COPD (n=7)  
219 were serum-starved overnight and incubated with TGF- $\beta$  (1ng/ml) and FBS (2.5%) for 24  
220 hrs. Baseline mRNA expression (A-D) and the effect of TGF- $\beta$  (1ng/ml) and FBS (2.5%) on  
221 the mRNA expression (E-H) of PGC-1 $\alpha$  (A and E), PGC-1 $\beta$  (B and F), PDK-1 (C and G)  
222 and LDHA (D and H). Data are expressed as relative mRNA expression (A-D) and as fold-  
223 change compared to untreated cells (E-H). (I) Effect of glycolysis inhibition on healthy  
224 smoker and COPD ASMC proliferation. ASMCs from healthy smokers (n=9) and COPD  
225 patients (n=9) were pre-treated with the glycolysis inhibitor 2-deoxy-D-glucose (1-10 $\mu$ M) for  
226 1hr and then stimulated with TGF- $\beta$  (1ng/ml) and FBS (2.5%) for 72hrs. Changes in DNA  
227 synthesis were determined by measuring BrdU incorporation and expressed as percentage  
228 change compared to TGF- $\beta$ /FBS- treated cells. Bars represent mean  $\pm$  SEM. In panels (A-D)  
229 the horizontal lines represent the median for each group \* p<0.05, \*\*p<0.01, \*\*\* p<0.001. The  
230 clinical characteristics of the subjects that provided ASMCs for these experiments are  
231 provided in Supplementary Table E1.

232

233

234

235

236

237

Supplementary Figure E3

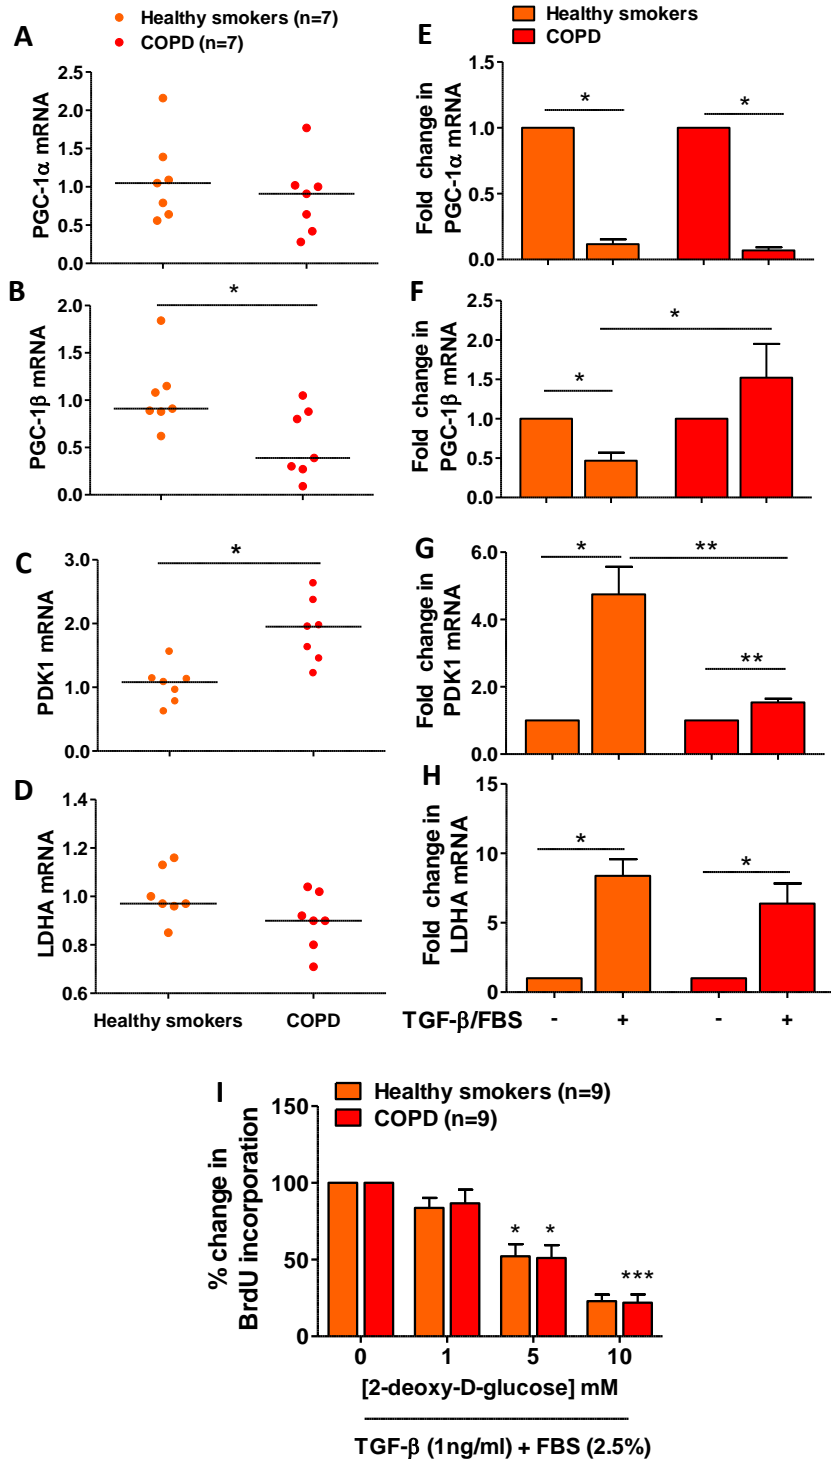

238 **Figure E4: Correlation of nucleoside levels to lung function.** ASMCs isolated from  
239 healthy non-smokers (n=6, ●), healthy smokers (n=6, ●) and patients with COPD (n=6, ●)  
240 were serum-starved overnight. Cell pellets were collected after incubation with TGF- $\beta$   
241 (1ng/ml) and FBS (2.5%) for 48hrs. The scaled intensities of uridine (**A**), cytidine (**B**) and  
242 thymidine (**C**) were determined in cell lysates by LC-MS and were correlated to the  
243 FEV<sub>1</sub>/FVC of the subjects using the Spearman's correlation coefficient.

244

245

246

247

248

249

250

251

252

253

254

255

256

257

- Healthy non-smokers
- Healthy smokers
- COPD

A

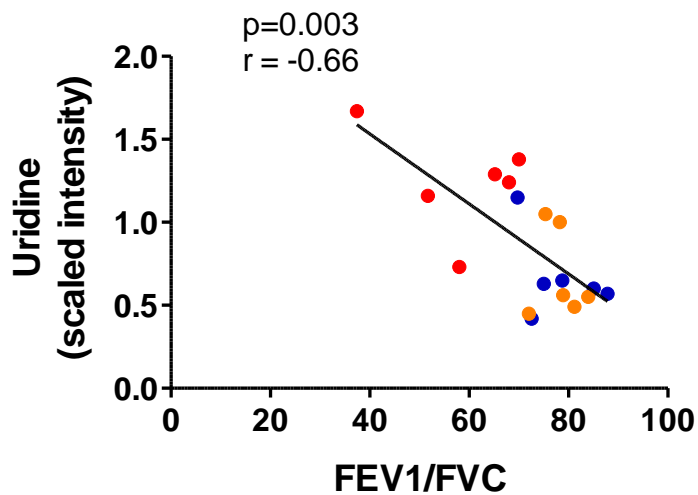

B

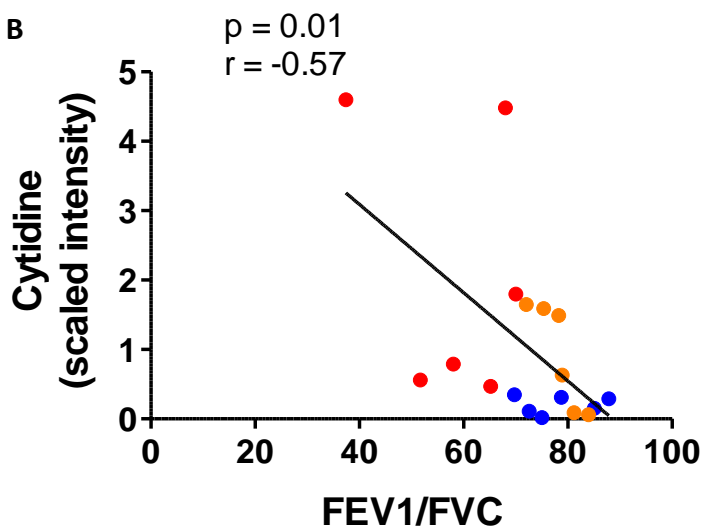

C

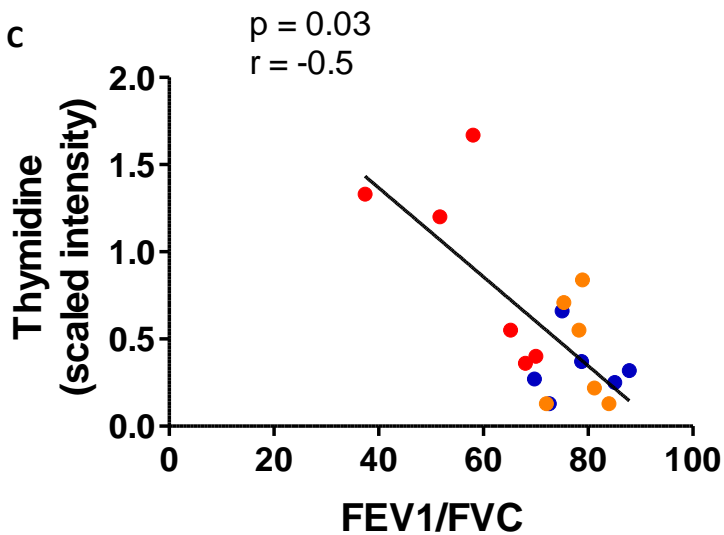

258 **Figure E5: Correlation of glutamine levels to lung function and the effect of glutamine**  
259 **depletion on TGF- $\beta$ /FBS-induced proliferation of COPD ASMCs.** ASMCs isolated from  
260 healthy non-smokers (n=6, ●), healthy smokers (n=6, ●) and patients with COPD (n=6, ●)  
261 were serum-starved overnight. Cell pellets were collected immediately after starvation (t=0;  
262 **A)** or after incubation in the absence (**B)** or presence of TGF- $\beta$  (1ng/ml) and FBS (2.5%; **C)**  
263 for 48hrs. The scaled intensities of glutamine were determined in cell lysates by LC-MS and  
264 were correlated to the FEV<sub>1</sub>/FVC of the subjects using the Spearman's correlation  
265 coefficient. (**D**) Effect of glutamine on COPD ASMC proliferation. ASMCs from COPD  
266 patients (n=6) were stimulated with TGF- $\beta$  (1ng/ml) and FBS (2.5%) for 72hrs in the  
267 presence or absence of glutamine (4mM) supplementation. Changes in DNA synthesis were  
268 determined by measuring BrdU incorporation. Data are expressed as percentage change  
269 compared to glutamine-supplemented, TGF- $\beta$ /FBS-treated cells. Bars represent mean  $\pm$  SEM.  
270 \* p<0.05.

271

272

273

274

275

276

277

278



# Supplementary Figure E5

- Healthy non-smokers
- Healthy smokers
- COPD

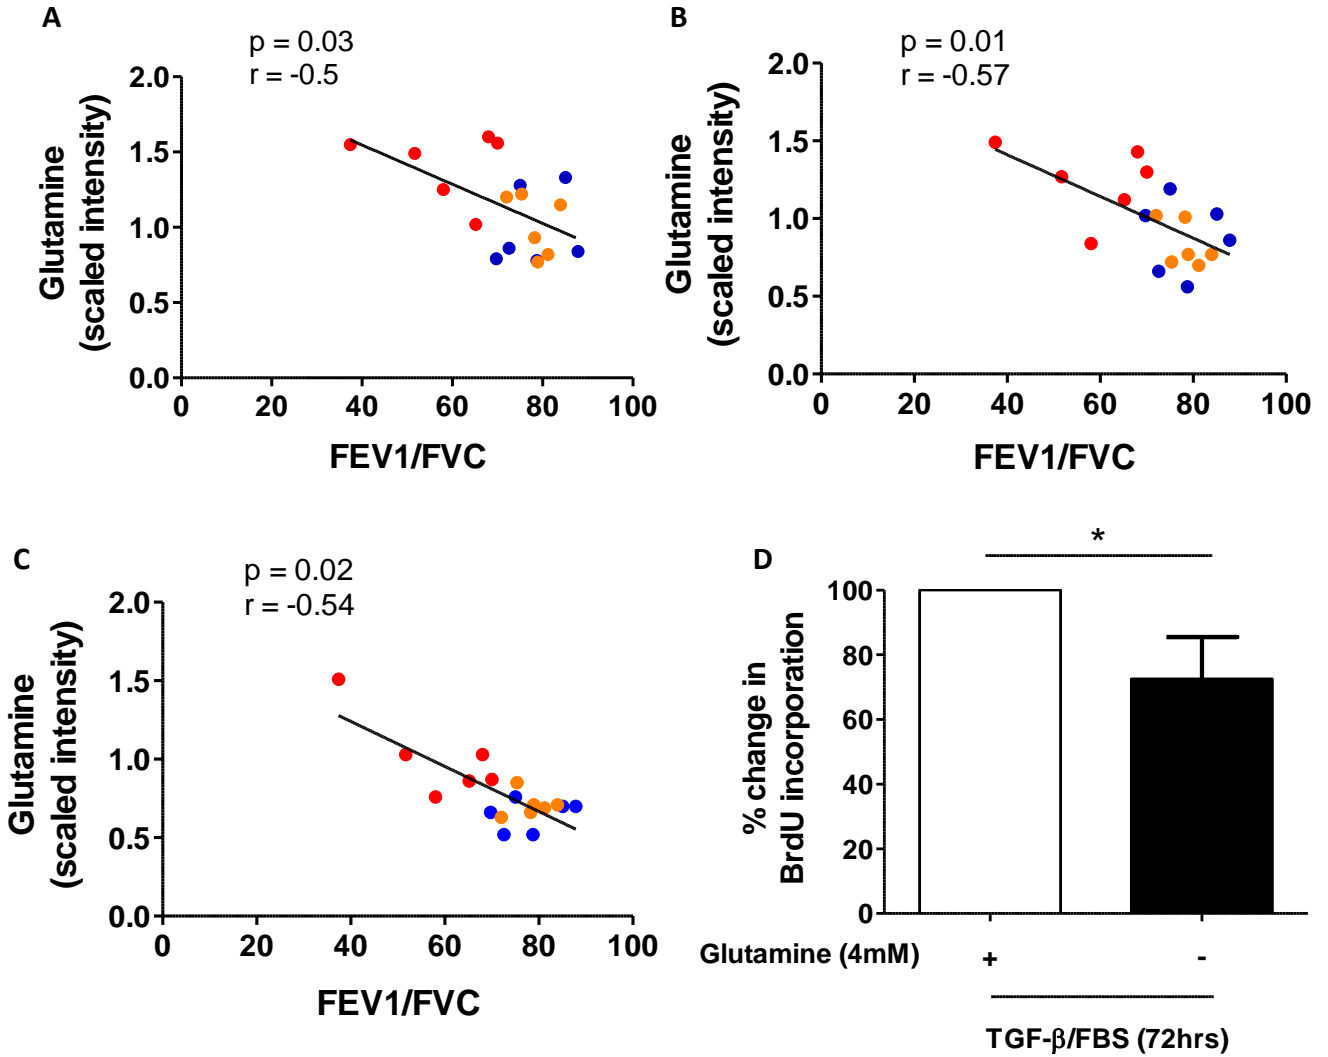

279 **Figure E6: Correlation of fatty acid oxidation index to lung function and age.** ASMCs  
280 isolated from healthy non-smokers (n=6, ●), healthy smokers (n=6, ●) and patients with  
281 COPD (n=6, ●) were serum-starved overnight. Cell pellets were collected after incubation  
282 for 48hrs in the absence of stimulation. The scaled intensities of acetylcarnitine (C2),  
283 propionylcarnitine (C3) and free carnitine (C0) were determined in cell lysates by LC-MS.  
284 The (C2+C3)/C0 ratios were correlated to the FEV<sub>1</sub>/FVC (**A**) and age (**B**) of the subjects  
285 using the Spearman's correlation coefficient.

286

287

288

289

290

291

292

293

294

295

296

297

298

- Healthy non-smokers
- Healthy smokers
- COPD

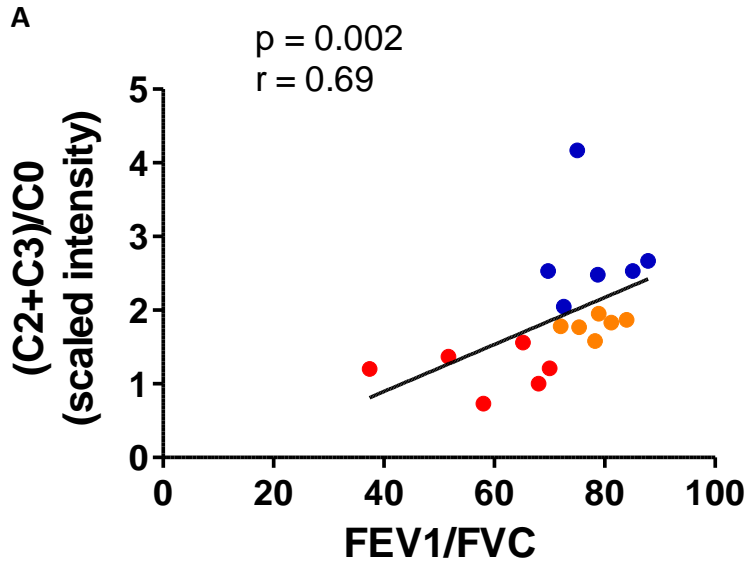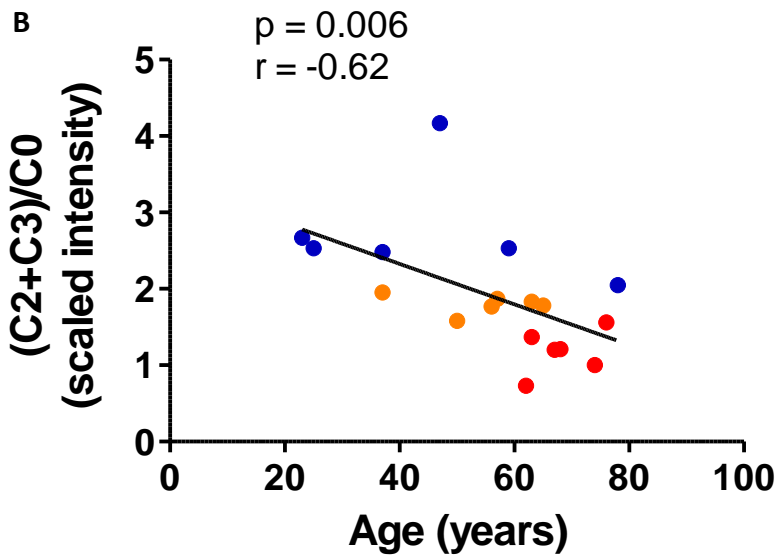

299 **Figure E7: The effect of glutathione synthesis inhibition on the mitochondrial ROS**  
300 **levels and number of COPD ASMCs, and relative levels of S-adenosylmethionine and**  
301 **cystathionine. (A-B)** Effect of glutathione synthesis inhibition on mitochondrial ROS levels  
302 and the number of COPD ASMCs. ASMCs from COPD patients (n=4-5) were pre-treated  
303 with the glutathione synthesis inhibitor buthionine sulfoximine (BSO; 10 and 25 $\mu$ M) for 1hr  
304 and then stimulated with TGF- $\beta$  (1ng/ml) and FBS (2.5%). Mitochondrial ROS levels were  
305 determined after 48hrs by MitoSOX staining (**A**) and number of viable cells after 72hrs by  
306 counting after trypan blue staining (**B**). Bars represent mean  $\pm$  SEM. (**C-D**) Relative levels of  
307 S-adenosylmethionine (SAM) and cystathionine. ASMCs isolated from healthy non-smokers  
308 (n=6), healthy smokers (n=6) and patients with COPD (n=6) were serum-starved overnight.  
309 Cell pellets were collected immediately after starvation (t=0) or after incubation in the  
310 absence or presence of TGF- $\beta$  (1ng/ml) and FBS (2.5%; TGF- $\beta$ /FBS) for 48hrs, and the  
311 scaled intensities of SAM (**C**) and cystathionine (**D**) were determined in cell lysates by LC-  
312 MS. Whiskers represent the spread of the data points. Horizontal lines indicate the median  
313 value and the + symbol indicates the mean of the values. \* p<0.05, \*\* p<0.01.

314

315

316

317

318

319

320

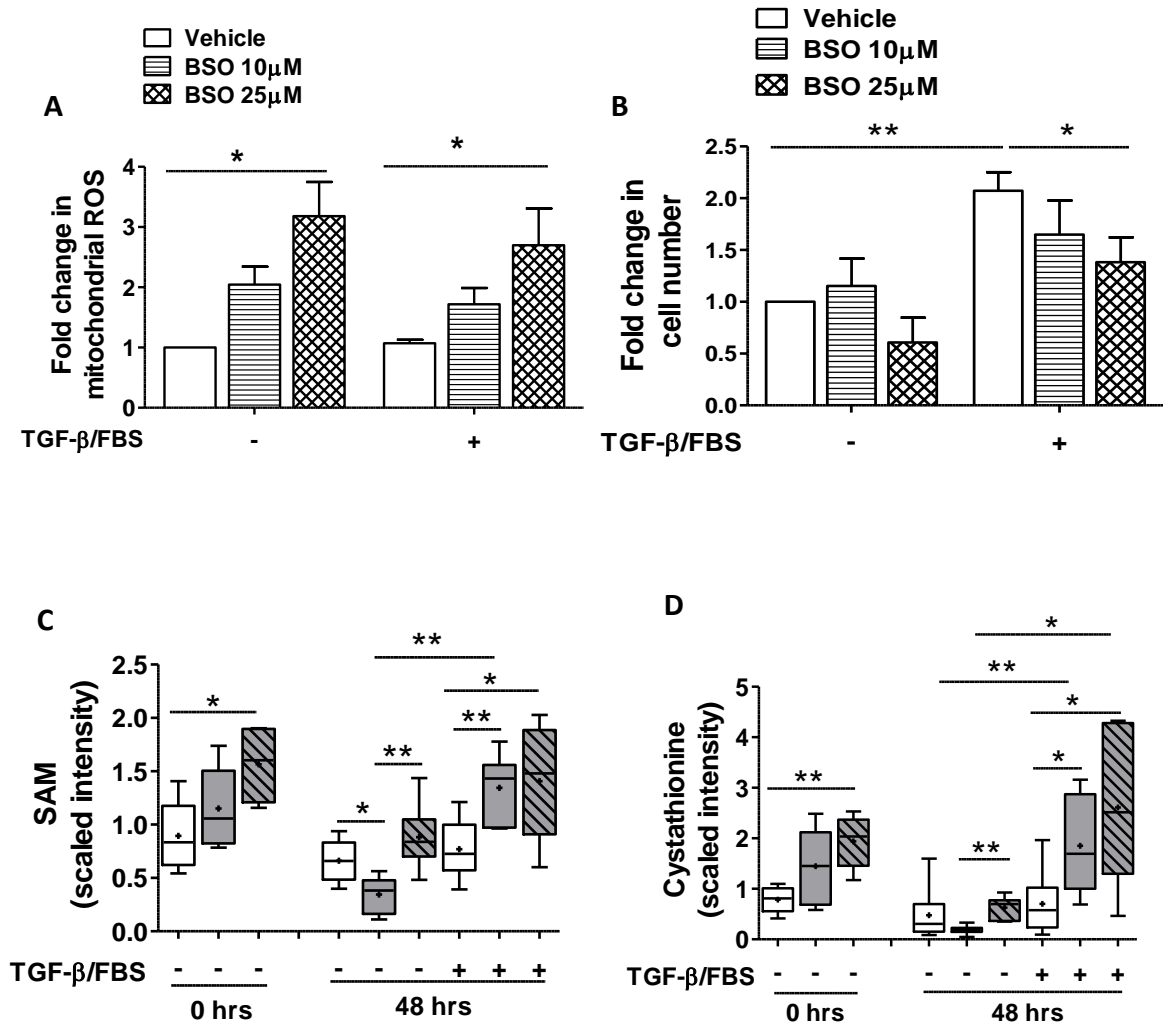

321 **Supplementary Table E1.** Clinical characteristics of subjects that provided ASMCs used for  
 322 determining proliferation and mRNA expression.

| <b>Subjects that provided ASMCs used for measuring proliferation</b>   |                        |                 |
|------------------------------------------------------------------------|------------------------|-----------------|
|                                                                        | <b>Healthy smokers</b> | <b>COPD</b>     |
| <b>Number</b>                                                          | 7                      | 6               |
| <b>Age (years)</b>                                                     | 68 ± 3.45              | 70.33 ± 3.41    |
| <b>Gender (M/F)</b>                                                    | 4/3                    | 6/0             |
| <b>Smoking (current/ex)</b>                                            | 0/7                    | 6/0             |
| <b>Smoking pack years</b>                                              | 29.37 ± 5.11           | 61.40 ± 23.12   |
| <b>FEV<sub>1</sub> (L)</b>                                             | 2.6 ± 0.17             | 2.43 ± 0.21     |
| <b>FEV<sub>1</sub> (% predicted)</b>                                   | 99.57 ± 4.1            | 76.3 ± 6.86 *   |
| <b>FVC (L)</b>                                                         | 3.4 ± 0.26             | 4.02 ± 0.30     |
| <b>FEV<sub>1</sub>/FVC (%)</b>                                         | 76.91 ± 1.66           | 60.62 ± 2.71 ** |
| <b>Subjects that provided ASMCs used for measuring mRNA expression</b> |                        |                 |
|                                                                        | <b>Healthy smokers</b> | <b>COPD</b>     |
| <b>Number</b>                                                          | 7                      | 7               |
| <b>Age (years)</b>                                                     | 68 ± 3.45              | 70.50 ± 2.72    |
| <b>Gender (M/F)</b>                                                    | 4/3                    | 5/2             |
| <b>Smoking (current/ex)</b>                                            | 0/7                    | 7/0             |
| <b>Smoking pack years</b>                                              | 29.37 ± 5.11           | 76.40 ± 22.25 * |
| <b>FEV<sub>1</sub> (L)</b>                                             | 2.6 ± 0.17             | 2.40 ± 0.21     |
| <b>FEV<sub>1</sub> (% predicted)</b>                                   | 99.57 ± 4.1            | 74 ± 6.76 *     |
| <b>FVC (L)</b>                                                         | 3.4 ± 0.26             | 3.56 ± 0.32     |
| <b>FEV<sub>1</sub>/FVC (%)</b>                                         | 76.91 ± 1.66           | 66.87 ± 1.00 ** |

323

324 Data are expressed as mean ± SEM. FEV<sub>1</sub>, forced expiratory volume in 1s; FVC, forced vital  
 325 capacity. \*  $p < 0.05$ , \*\*  $p < 0.01$  compared to healthy smokers.

326

327

328 **Supplementary Table E2A:** Differentially regulated metabolites between ASMCs from COPD patients and healthy non-smokers under  
 329 unstimulated conditions  
 330

| Metabolite                                     | Sub-pathway                                 | Super-pathway                     | KEGG                   | HMDB number               | Fold change | p value  |
|------------------------------------------------|---------------------------------------------|-----------------------------------|------------------------|---------------------------|-------------|----------|
| 5-methyluridine (ribothymidine)                | Pyrimidine Metabolism, Uracil containing    | Nucleotide metabolism             |                        | <a href="#">HMDB00884</a> | 6.97        | 0.01197  |
| 1-methyladenosine                              | Purine Metabolism, Adenine containing       | Nucleotide metabolism             | <a href="#">C02494</a> | <a href="#">HMDB03331</a> | 4.04        | 0.00114  |
| ornithine                                      | Urea cycle; Arginine and Proline Metabolism | Amino acid and protein metabolism | <a href="#">C00077</a> | <a href="#">HMDB03374</a> | 3.77        | 0.013445 |
| galactonate                                    | Fructose, Mannose, Galactose Metabolism     | Carbohydrate Metabolism           | <a href="#">C00880</a> | <a href="#">HMDB00565</a> | 3.72        | 0.022714 |
| homocitrulline                                 | Urea cycle; Arginine and Proline Metabolism | Amino acid and protein metabolism | <a href="#">C02427</a> | <a href="#">HMDB00679</a> | 3.54        | 0.007792 |
| 2-docosaheptaenoyl glycerophosphoethanolamine* | Lysolipid                                   | Lipid and fatty acid metabolism   |                        |                           | 3.32        | 0.026702 |
| X - 22776 #                                    | Unknown                                     | Unknown                           |                        |                           | 3.31        | 0.000409 |
| N-palmitoyl-sphingosine*                       | Sphingolipid Metabolism                     | Lipid and fatty acid metabolism   |                        | <a href="#">HMDB04949</a> | 3.22        | 0.005381 |
| gamma-glutamylleucine                          | Gamma-glutamyl Amino Acid                   | Amino acid and protein metabolism |                        | <a href="#">HMDB11171</a> | 3.21        | 0.005038 |
| gamma-glutamylvaline                           | Gamma-glutamyl Amino Acid                   | Amino acid and protein metabolism |                        | <a href="#">HMDB11172</a> | 3.16        | 0.022138 |
| 2-hydroxystearate                              | Fatty acid, monohydroxy                     | Lipid and fatty acid metabolism   | <a href="#">C03045</a> |                           | 3.15        | 0.001016 |
| X - 12097 #                                    | Unknown                                     | Unknown                           |                        |                           | 3.14        | 0.00035  |
| 2-aminoadipate                                 | Lysine metabolism                           | Amino acid and protein metabolism | <a href="#">C00956</a> | <a href="#">HMDB00510</a> | 2.94        | 0.003054 |
| citrulline                                     | Urea cycle; Arginine and Proline Metabolism | Amino acid and protein metabolism | <a href="#">C00327</a> | <a href="#">HMDB00904</a> | 2.86        | 0.017535 |
| caprylate (8:0)                                | Medium Chain Fatty Acid                     | Lipid and fatty acid metabolism   | <a href="#">C06423</a> | <a href="#">HMDB00482</a> | 2.79        | 0.003041 |
| pipecolate                                     | Lysine Metabolism                           | Amino acid and protein metabolism | <a href="#">C00408</a> | <a href="#">HMDB00070</a> | 2.75        | 0.00166  |
| X - 17010 #                                    | Unknown                                     | Unknown                           |                        |                           | 2.73        | 0.00033  |
| 1-oleoylglycerophosphoserine                   | Lysolipid                                   | Lipid and fatty acid metabolism   |                        |                           | 2.7         | 0.017037 |

|                                   |                                             |                                   |                        |                           |      |          |
|-----------------------------------|---------------------------------------------|-----------------------------------|------------------------|---------------------------|------|----------|
| 2-hydroxypalmitate                | Fatty acid, monohydroxy                     | Lipid and fatty acid metabolism   |                        | <a href="#">HMDB31057</a> | 2.68 | 0.005287 |
| 2-hydroxydecanoate                | Fatty acid, monohydroxy                     | Lipid and fatty acid metabolism   |                        | <a href="#">HMDB06725</a> | 2.67 | 0.003514 |
| 6-oxopiperidine-2-carboxylic acid | Drug                                        | Xenobiotics                       |                        |                           | 2.58 | 0.000196 |
| gamma-glutamylthreonine*          | Gamma-glutamyl Amino Acid                   | Amino acid and protein metabolism |                        | <a href="#">HMDB29159</a> | 2.41 | 0.006603 |
| X - 21757 #                       | Unknown                                     | Unknown                           |                        |                           | 2.4  | 0.014598 |
| deoxycarnitine                    | Carnitine metabolism                        | Lipid and fatty acid metabolism   | <a href="#">C01181</a> | <a href="#">HMDB01161</a> | 2.33 | 0.000217 |
| gamma-glutamylisoleucine*         | Gamma-glutamyl Amino Acid                   | Amino acid and protein metabolism |                        | <a href="#">HMDB11170</a> | 2.3  | 0.009687 |
| 4-guanidinobutanoate              | Guanidino and Acetamido Metabolism          | Amino acid and protein metabolism | <a href="#">C01035</a> | <a href="#">HMDB03464</a> | 2.25 | 0.017796 |
| 2-hydroxyadipate                  | Fatty acid, dicarboxylate                   | Lipid and fatty acid metabolism   | <a href="#">C02360</a> | <a href="#">HMDB00321</a> | 2.22 | 0.003147 |
| glutarate (pentanedioate)         | Lysine metabolism                           | Amino acid and protein metabolism | <a href="#">C00489</a> | <a href="#">HMDB00661</a> | 2.1  | 0.000395 |
| myristoleate (14:1n5)             | Long chain fatty acid                       | Lipid and fatty acid metabolism   | <a href="#">C08322</a> | <a href="#">HMDB02000</a> | 2.09 | 0.00804  |
| caproate (6:0)                    | Medium chain fatty acid                     | Lipid and fatty acid metabolism   | <a href="#">C01585</a> | <a href="#">HMDB00535</a> | 2.08 | 0.000503 |
| beta-alanine                      | Pyrimidine Metabolism, Uracil containing    | Nucleotide metabolism             | <a href="#">C00099</a> | <a href="#">HMDB00056</a> | 2.06 | 0.001725 |
| 1-stearoylglycerophosphoserine*   | Lysolipid                                   | Lipid and fatty acid metabolism   |                        |                           | 2    | 0.01922  |
| pyroglutamine*                    | Glutamate metabolism                        | Amino acid and protein metabolism |                        |                           | 1.97 | 0.002622 |
| X - 16271 #                       | Unknown                                     | Unknown                           |                        |                           | 1.94 | 0.045686 |
| 2-methylcitrate                   | TCA cycle                                   | Energy                            | <a href="#">C02225</a> | <a href="#">HMDB00379</a> | 1.91 | 0.012576 |
| benzoate                          | Benzoate Metabolism                         | Xenobiotics                       | <a href="#">C00180</a> | <a href="#">HMDB01870</a> | 1.9  | 0.014801 |
| tyrosylvaline                     | Dipeptide                                   | Amino acid and protein metabolism |                        |                           | 1.89 | 0.029233 |
| N-acetylarginine                  | Urea cycle; Arginine and Proline Metabolism | Amino acid and protein metabolism | <a href="#">C02562</a> | <a href="#">HMDB04620</a> | 1.88 | 0.003359 |
| X - 23086 #                       | Unknown                                     | Unknown                           |                        |                           | 1.88 | 0.001418 |
| nervonoyl sphingomyelin*          | Sphingolipid Metabolism                     | Lipid and fatty acid metabolism   |                        |                           | 1.86 | 0.000445 |
| maltose                           | Glycogen Metabolism                         | Carbohydrate Metabolism           | <a href="#">C00208</a> | <a href="#">HMDB00163</a> | 1.84 | 0.045368 |
| phenylacetyl glycine              | Phenylalanine and Tyrosine metabolism       | Amino acid and protein metabolism | <a href="#">C05598</a> | <a href="#">HMDB00821</a> | 1.84 | 0.009343 |
| uridine-2',3'-cyclic              | Pyrimidine metabolism, Uracyl               | Nucleotide metabolism             | <a href="#">C02355</a> | <a href="#">HMDB11640</a> | 1.8  | 0.027908 |



|                                                   |                                           |                                   |                        |                           |      |          |
|---------------------------------------------------|-------------------------------------------|-----------------------------------|------------------------|---------------------------|------|----------|
| monophosphate                                     | containing                                |                                   |                        |                           |      |          |
| glycine                                           | Glycine, Serine and Threonine Metabolism  | Amino acid and protein metabolism | <a href="#">C00037</a> | <a href="#">HMDB00123</a> | 1.8  | 0.035971 |
| 3-indoxyl sulfate                                 | Tryptophan Metabolism                     | Amino acid and protein metabolism |                        | <a href="#">HMDB00682</a> | 1.79 | 0.001765 |
| cysteine-glutathione disulfide                    | Glutathione Metabolism                    | Amino acid and protein metabolism |                        | <a href="#">HMDB00656</a> | 1.78 | 0.037991 |
| alpha-hydroxyisovalerate                          | Leucine, Isoleucine and Valine Metabolism | Amino acid and protein metabolism |                        | <a href="#">HMDB00407</a> | 1.77 | 0.048525 |
| myo-inositol                                      | Inositol Metabolism                       | Lipid and fatty acid metabolism   | <a href="#">C00137</a> | <a href="#">HMDB00211</a> | 1.73 | 0.047074 |
| inositol 1-phosphate (I1P)                        | Inositol metabolism                       | Lipid and fatty acid metabolism   | <a href="#">C04006</a> | <a href="#">HMDB00213</a> | 1.7  | 0.008072 |
| 1-arachidonoyl-GPE* (20:4)*                       | Lysolipid                                 | Lipid and fatty acid metabolism   |                        | <a href="#">HMDB11517</a> | 1.69 | 0.018094 |
| heptanoate (7:0)                                  | Medium Chain Fatty Acid                   | Lipid and fatty acid metabolism   | <a href="#">C17714</a> | <a href="#">HMDB00666</a> | 1.69 | 0.000637 |
| 3-(4-hydroxyphenyl)lactate (HPLA)                 | Phenylalanine and Tyrosine Metabolism     | Amino acid and protein metabolism | <a href="#">C03672</a> | <a href="#">HMDB00755</a> | 1.68 | 0.001951 |
| kynurenine                                        | Tryptophan metabolism                     | Amino acid and protein metabolism | <a href="#">C00328</a> | <a href="#">HMDB00684</a> | 1.63 | 0.016818 |
| vaccenate (18:1n7)                                | Long Chain Fatty Acid                     | Lipid and fatty acid metabolism   | <a href="#">C08367</a> | <a href="#">HMDB03231</a> | 1.63 | 0.040716 |
| taurochenodeoxycholate                            | Primary Bile Acid Metabolism              | Lipid and fatty acid metabolism   | <a href="#">C05465</a> | <a href="#">HMDB00951</a> | 1.62 | 0.048198 |
| 1-methylimidazoleacetate                          | Histidine Metabolism                      | Amino acid and protein metabolism | <a href="#">C05828</a> | <a href="#">HMDB02820</a> | 1.59 | 0.00591  |
| myristate (14:0)                                  | Long Chain Fatty Acid                     | Lipid and fatty acid metabolism   | <a href="#">C06424</a> | <a href="#">HMDB00806</a> | 1.58 | 0.017948 |
| phosphocholine                                    | Lysolipid                                 | Lipid and fatty acid metabolism   | <a href="#">C00588</a> | <a href="#">HMDB01565</a> | 1.58 | 0.017124 |
| glycochenodeoxycholate                            | Primary Bile Acid Metabolism              | Lipid and fatty acid metabolism   | <a href="#">C05466</a> | <a href="#">HMDB00637</a> | 1.58 | 0.042949 |
| stearoyl-arachidonoyl-glycerophosphoinositol (1)* | Lysolipid                                 | Lipid and fatty acid metabolism   |                        |                           | 1.57 | 0.007459 |
| stearate (18:0)                                   | Long Chain Fatty Acid                     | Lipid and fatty acid metabolism   | <a href="#">C01530</a> | <a href="#">HMDB00827</a> | 1.57 | 0.019851 |
| oleate (18:1n9)                                   | Long Chain Fatty Acid                     | Lipid and fatty acid metabolism   | <a href="#">C00712</a> | <a href="#">HMDB00207</a> | 1.56 | 0.016201 |
| X - 16071 #                                       | Unknown                                   | Unknown                           |                        |                           | 1.56 | 0.031293 |
| arachidate (20:0)                                 | Long Chain Fatty Acid                     | Lipid and fatty acid metabolism   | <a href="#">C06425</a> | <a href="#">HMDB02212</a> | 1.55 | 0.046628 |
| palmitate (16:0)                                  | Long Chain Fatty Acid                     | Lipid and fatty acid metabolism   | <a href="#">C00249</a> | <a href="#">HMDB00220</a> | 1.54 | 0.032418 |
| sulfate*                                          | Chemical                                  | Xenobiotics                       | <a href="#">C00059</a> | <a href="#">HMDB01448</a> | 1.54 | 0.020297 |
| taurocholate                                      | Primary Bile Acid Metabolism              | Lipid and fatty acid metabolism   | <a href="#">C05122</a> | <a href="#">HMDB00036</a> | 1.54 | 0.038617 |

|                                                       |                                           |                                   |                        |                           |      |          |
|-------------------------------------------------------|-------------------------------------------|-----------------------------------|------------------------|---------------------------|------|----------|
| margarate (17:0)                                      | Long Chain Fatty Acid                     | Lipid and fatty acid metabolism   |                        | <a href="#">HMDB02259</a> | 1.53 | 0.030698 |
| glycocholate                                          | Primary Bile Acid Metabolism              | Lipid and fatty acid metabolism   | <a href="#">C01921</a> | <a href="#">HMDB00138</a> | 1.53 | 0.044535 |
| 3-methylglutaconate                                   | Leucine, Isoleucine and Valine Metabolism | Amino acid and protein metabolism |                        | <a href="#">HMDB00522</a> | 1.53 | 0.007822 |
| nonadecanoate (19:0)                                  | Long Chain Fatty Acid                     | Lipid and fatty acid metabolism   | <a href="#">C16535</a> | <a href="#">HMDB00772</a> | 1.52 | 0.038521 |
| pelargonate (9:0)                                     | Medium Chain Fatty Acid                   | Lipid and fatty acid metabolism   | <a href="#">C01601</a> | <a href="#">HMDB00847</a> | 1.52 | 0.014941 |
| methylsuccinate                                       | Leucine, Isoleucine and Valine Metabolism | Amino acid and protein metabolism |                        | <a href="#">HMDB01844</a> | 1.52 | 0.023483 |
| stearoyl-arachidonoyl-glycerophosphoethanolamine (1)* | Lysolipid                                 | Lipid and fatty acid metabolism   |                        |                           | 1.51 | 0.012055 |
| palmitoyl-palmitoyl-glycerophosphocholine (2)*        | Lysolipid                                 | Lipid and fatty acid metabolism   |                        |                           | 1.5  | 0.012538 |
| palmitoyl-palmitoyl-glycerophosphocholine (1)*        | Lysolipid                                 | Lipid and fatty acid metabolism   |                        |                           | 1.5  | 0.021283 |
| 3-hydroxyisobutyrate                                  | Leucine, Isoleucine and Valine Metabolism | Amino acid and protein metabolism | <a href="#">C06001</a> | <a href="#">HMDB00336</a> | 1.44 | 0.010204 |
| N-acetylhistidine                                     | Histidine metabolism                      | Amino acid and protein metabolism | <a href="#">C02997</a> | <a href="#">HMDB32055</a> | 1.43 | 0.013644 |
| nicotinamide                                          | Nicotinate and Nicotinamide Metabolism    | Cofactors and Vitamins            | <a href="#">C00153</a> | <a href="#">HMDB01406</a> | 1.43 | 0.011378 |
| amphotericin B                                        | Drug                                      | Xenobiotics                       | <a href="#">C06573</a> | <a href="#">HMDB14819</a> | 1.42 | 0.048217 |
| phosphate                                             | Oxidative Phosphorylation                 | Energy                            | <a href="#">C00009</a> | <a href="#">HMDB01429</a> | 1.39 | 0.009716 |
| X - 12688 #                                           | Unknown                                   | Unknown                           |                        |                           | 0.56 | 0.004675 |
| X - 14255 #                                           | Unknown                                   | Unknown                           |                        |                           | 0.42 | 0.040394 |
| methyl glucopyranoside (alpha + beta)                 | Food Component/Plant                      | Xenobiotics                       |                        |                           | 0.38 | 0.041489 |
| methionylphenylalanine                                | Dipeptide                                 | Amino acid and protein metabolism |                        |                           | 0.3  | 0.033668 |
| isoleucylvaline                                       | Dipeptide                                 | Amino acid and protein metabolism |                        |                           | 0.26 | 0.027382 |
| N-acetyl-aspartyl-glutamate (NAAG)                    | Glutamate Metabolism                      | Amino acid and protein metabolism | <a href="#">C12270</a> | <a href="#">HMDB01067</a> | 0.17 | 0.028924 |
| phosphoethanolamine (PE)                              | Phospholipid Metabolism                   | Lipid and fatty acid metabolism   | <a href="#">C00346</a> | <a href="#">HMDB00224</a> | 0.12 | 0.004473 |

331

332 \* Indicates compounds that have not been officially confirmed based on a standard, but we are confident in their identity

333

334 # Unidentified metabolites

335

336

337

338 **Supplementary Table E2B:** Differentially regulated metabolites between ASMCs from COPD patients and healthy smokers under unstimulated  
 339 conditions  
 340

| Metabolite                      | Sub-pathway                                      | Super-pathway                     | KEGG                   | HMDB number               | Fold change | p value  |
|---------------------------------|--------------------------------------------------|-----------------------------------|------------------------|---------------------------|-------------|----------|
| 1-stearoyl-GPC (18:0)           | Lysolipid                                        | Lipid and fatty acid metabolism   |                        | <a href="#">HMDB10384</a> | 6.43        | 0.032001 |
| gluconate                       | Food Component/Plant                             | Xenobiotics                       | <a href="#">C00257</a> | <a href="#">HMDB00625</a> | 4.7         | 0.043102 |
| 3'-dephosphocoenzyme A          | Pantothenate and CoA Metabolism                  | Cofactors and Vitamins            | <a href="#">C00882</a> | <a href="#">HMDB01373</a> | 4.32        | 0.046942 |
| sphingosine                     | Sphingolipid Metabolism                          | Lipid and fatty acid metabolism   | <a href="#">C00319</a> | <a href="#">HMDB00252</a> | 4.03        | 0.026914 |
| 5-methyluridine (ribothymidine) | Pyrimidine Metabolism, Uracil containing         | Nucleotide metabolism             |                        | <a href="#">HMDB00884</a> | 3.74        | 0.027635 |
| uracil                          | Pyrimidine Metabolism, Uracil containing         | Nucleotide metabolism             | <a href="#">C00106</a> | <a href="#">HMDB00300</a> | 3.55        | 0.02946  |
| 2-hydroxystearate               | Fatty Acid, Monohydroxy                          | Lipid and fatty acid metabolism   | <a href="#">C03045</a> |                           | 3.08        | 0.00111  |
| X - 21861 #                     | Unknown                                          | Unknown                           |                        |                           | 2.99        | 0.011491 |
| 2-hydroxypalmitate              | Fatty Acid, Monohydroxy                          | Lipid and fatty acid metabolism   |                        | <a href="#">HMDB31057</a> | 2.95        | 0.003617 |
| X - 22776 #                     | Unknown                                          | Unknown                           |                        |                           | 2.92        | 0.000698 |
| N-palmitoyl-sphingosine*        | Sphingolipid Metabolism                          | Lipid and fatty acid metabolism   |                        | <a href="#">HMDB04949</a> | 2.88        | 0.007668 |
| glucuronate                     | Aminosugar Metabolism                            | Carbohydrate                      | <a href="#">C00191</a> | <a href="#">HMDB00127</a> | 2.8         | 0.041295 |
| X - 17010 #                     | Unknown                                          | Unknown                           |                        |                           | 2.73        | 0.000332 |
| gamma-aminobutyrate (GABA)      | Glutamate Metabolism                             | Amino acid and protein metabolism | <a href="#">C00334</a> | <a href="#">HMDB00112</a> | 2.73        | 0.048425 |
| 1-oleoylglycerophosphoserine    | Lysolipid                                        | Lipid and fatty acid metabolism   |                        |                           | 2.69        | 0.017222 |
| 1-stearoylglycerophosphoserine* | Lysolipid                                        | Lipid and fatty acid metabolism   |                        |                           | 2.65        | 0.005129 |
| 2-hydroxydecanoate              | Fatty Acid, Monohydroxy                          | Lipid and fatty acid metabolism   |                        |                           | 2.63        | 0.003735 |
| S-adenosylmethionine (SAM)      | Methionine, Cysteine, SAM and Taurine Metabolism | Amino acid and protein metabolism | <a href="#">C00019</a> | <a href="#">HMDB01185</a> | 2.56        | 0.002649 |
| palmitoyl sphingomyelin         | Sphingolipid Metabolism                          | Lipid and fatty acid metabolism   |                        |                           | 2.56        | 0.008971 |
| sedoheptulose-7-phosphate       | Pentose Phosphate Pathway                        | Carbohydrate                      | <a href="#">C05382</a> | <a href="#">HMDB01068</a> | 2.51        | 0.017047 |
| 1-oleoylglycerophosphoglycerol* | Lysolipid                                        | Lipid and fatty acid metabolism   |                        |                           | 2.44        | 0.016683 |
| gamma-glutamylvaline            | Gamma-glutamyl Amino Acid                        | Amino acid and protein            |                        | <a href="#">HMDB11172</a> | 2.38        | 0.047442 |

|                            |                                                         |                                   |                        |                           |      |          |
|----------------------------|---------------------------------------------------------|-----------------------------------|------------------------|---------------------------|------|----------|
|                            |                                                         | metabolism                        |                        |                           |      |          |
| caprylate (8:0)            | Medium Chain Fatty Acid                                 | Lipid and fatty acid metabolism   | <a href="#">C06423</a> | <a href="#">HMDB00482</a> | 2.33 | 0.006819 |
| X - 21755 #                | Unknown                                                 | Unknown                           |                        |                           | 2.26 | 0.009284 |
| tyrosylvaline              | Dipeptide                                               | Amino acid and protein metabolism |                        |                           | 2.2  | 0.013348 |
| caproate (6:0)             | Medium Chain Fatty Acid                                 | Lipid and fatty acid metabolism   | <a href="#">C01585</a> | <a href="#">HMDB00535</a> | 2.09 | 0.000478 |
| phosphocholine             | Phospholipid Metabolism                                 | Lipid and fatty acid metabolism   | <a href="#">C00588</a> | <a href="#">HMDB01565</a> | 2.09 | 0.001689 |
| alpha-hydroxyisovalerate   | Leucine, Isoleucine and Valine Metabolism               | Amino acid and protein metabolism |                        | <a href="#">HMDB00407</a> | 2.09 | 0.021114 |
| inositol 1-phosphate (I1P) | Inositol Metabolism                                     | Lipid and fatty acid metabolism   | <a href="#">C04006</a> | <a href="#">HMDB00213</a> | 2.06 | 0.00168  |
| myristoleate (14:1n5)      | Long Chain Fatty Acid                                   | Lipid and fatty acid metabolism   | <a href="#">C08322</a> | <a href="#">HMDB02000</a> | 2.03 | 0.009503 |
| cholestanol                | Sterol                                                  | Lipid and fatty acid metabolism   | <a href="#">C12978</a> | <a href="#">HMDB00908</a> | 2.03 | 0.039842 |
| gamma-glutamylisoleucine*  | Gamma-glutamyl Amino Acid                               | Amino acid and protein metabolism |                        | <a href="#">HMDB11170</a> | 2.02 | 0.018381 |
| X - 21756 #                | Unknown                                                 | Unknown                           |                        |                           | 2.02 | 0.0269   |
| guanosine                  | Purine Metabolism, Guanine containing                   | Nucleotide metabolism             | <a href="#">C00387</a> | <a href="#">HMDB00133</a> | 1.91 | 0.04431  |
| 1-oleoyl-GPE (18:1)        | Lysolipid                                               | Lipid and fatty acid metabolism   |                        | <a href="#">HMDB11506</a> | 1.91 | 0.010694 |
| imidazole propionate       | Histidine Metabolism                                    | Amino acid and protein metabolism |                        | <a href="#">HMDB02271</a> | 1.88 | 0.019445 |
| 10-heptadecenoate (17:1n7) | Long Chain Fatty Acid                                   | Lipid and fatty acid metabolism   |                        | <a href="#">HMDB60038</a> | 1.87 | 0.032919 |
| 1-palmitoyl-GPE (16:0)     | Lysolipid                                               | Lipid and fatty acid metabolism   |                        | <a href="#">HMDB11503</a> | 1.86 | 0.044247 |
| pyridoxal                  | Vitamin B6 Metabolism                                   | Cofactors and Vitamins            | <a href="#">C00250</a> | <a href="#">HMDB01545</a> | 1.85 | 0.035159 |
| 2-oleoyl-GPE* (18:1)*      | Lysolipid                                               | Lipid and fatty acid metabolism   |                        |                           | 1.83 | 0.02813  |
| pentadecanoate (15:0)      | Long Chain Fatty Acid                                   | Lipid and fatty acid metabolism   | <a href="#">C16537</a> | <a href="#">HMDB00826</a> | 1.83 | 0.006154 |
| hypoxanthine               | Purine Metabolism,<br>(Hypo)Xanthine/Inosine containing | Nucleotide metabolism             | <a href="#">C00262</a> | <a href="#">HMDB00157</a> | 1.82 | 0.034854 |
| benzoate                   | Benzoate Metabolism                                     | Xenobiotics                       | <a href="#">C00180</a> | <a href="#">HMDB01870</a> | 1.81 | 0.020187 |
| oleate (18:1n9)            | Long Chain Fatty Acid                                   | Lipid and fatty acid metabolism   | <a href="#">C00712</a> | <a href="#">HMDB00207</a> | 1.8  | 0.004276 |
| kynurenine                 | Tryptophan Metabolism                                   | Amino acid and protein metabolism | <a href="#">C00328</a> | <a href="#">HMDB00684</a> | 1.79 | 0.007417 |

|                                                       |                                             |                                   |                        |                           |      |          |
|-------------------------------------------------------|---------------------------------------------|-----------------------------------|------------------------|---------------------------|------|----------|
| phosphate                                             | Oxidative Phosphorylation                   | Energy                            | <a href="#">C00009</a> | <a href="#">HMDB01429</a> | 1.78 | 0.000299 |
| palmitoyl-palmitoyl-glycerophosphocholine (1)*        | Lysolipid                                   | Lipid and fatty acid metabolism   |                        |                           | 1.77 | 0.004041 |
| 2-arachidonoyl-GPE* (20:4)*                           | Lysolipid                                   | Lipid and fatty acid metabolism   |                        |                           | 1.76 | 0.024152 |
| 4-acetamidobutanoate                                  | Polyamine Metabolism                        | Amino acid and protein metabolism | <a href="#">C02946</a> | <a href="#">HMDB03681</a> | 1.75 | 0.031077 |
| 1-arachidonoyl-GPE* (20:4)*                           | Lysolipid                                   | Lipid and fatty acid metabolism   |                        | <a href="#">HMDB11517</a> | 1.74 | 0.014111 |
| arachidate (20:0)                                     | Long Chain Fatty Acid                       | Lipid and fatty acid metabolism   | <a href="#">C06425</a> | <a href="#">HMDB02212</a> | 1.74 | 0.020642 |
| uridine                                               | Pyrimidine Metabolism, Uracil containing    | Nucleotide metabolism             | <a href="#">C00299</a> | <a href="#">HMDB00296</a> | 1.74 | 0.006457 |
| uridine-2',3'-cyclic monophosphate                    | Pyrimidine Metabolism, Uracil containing    | Nucleotide metabolism             | <a href="#">C02355</a> | <a href="#">HMDB11640</a> | 1.74 | 0.034844 |
| prolylhydroxyproline                                  | Urea cycle; Arginine and Proline Metabolism | Amino acid and protein metabolism |                        | <a href="#">HMDB06695</a> | 1.74 | 0.030657 |
| glycocholate                                          | Primary Bile Acid Metabolism                | Lipid and fatty acid metabolism   | <a href="#">C01921</a> | <a href="#">HMDB00138</a> | 1.72 | 0.018595 |
| N-acetylarginine                                      | Urea cycle; Arginine and Proline Metabolism | Amino acid and protein metabolism | <a href="#">C02562</a> | <a href="#">HMDB04620</a> | 1.71 | 0.007602 |
| gamma-glutamylthreonine*                              | Gamma-glutamyl Amino Acid                   | Amino acid and protein metabolism |                        | <a href="#">HMDB29159</a> | 1.71 | 0.042595 |
| stearoyl-arachidonoyl-glycerophosphoethanolamine (1)* | Lysolipid                                   | Lipid and fatty acid metabolism   |                        |                           | 1.71 | 0.002882 |
| phenylacetylglycine                                   | Phenylalanine and Tyrosine Metabolism       | Amino acid and protein metabolism | <a href="#">C05598</a> | <a href="#">HMDB00821</a> | 1.71 | 0.016456 |
| pipecolate                                            | Lysine Metabolism                           | Amino acid and protein metabolism | <a href="#">C00408</a> | <a href="#">HMDB00070</a> | 1.7  | 0.026618 |
| vaccenate (18:1n7)                                    | Long Chain Fatty Acid                       | Lipid and fatty acid metabolism   | <a href="#">C08367</a> | <a href="#">HMDB03231</a> | 1.7  | 0.030545 |
| beta-alanine                                          | Pyrimidine Metabolism, Uracil containing    | Nucleotide metabolism             | <a href="#">C00099</a> | <a href="#">HMDB00056</a> | 1.68 | 0.009542 |
| palmitoyl-palmitoyl-glycerophosphocholine (2)*        | Lysolipid                                   | Lipid and fatty acid metabolism   |                        |                           | 1.67 | 0.00351  |
| palmitoyl-linoleoyl-glycerophosphocholine (2)*        | Lysolipid                                   | Lipid and fatty acid metabolism   |                        |                           | 1.67 | 0.003005 |

|                                                   |                                                         |                                   |                        |                           |      |          |
|---------------------------------------------------|---------------------------------------------------------|-----------------------------------|------------------------|---------------------------|------|----------|
| X - 23086 #                                       | Unknown                                                 | Unknown                           |                        |                           | 1.66 | 0.004994 |
| myristate (14:0)                                  | Long Chain Fatty Acid                                   | Lipid and fatty acid metabolism   | <a href="#">C06424</a> | <a href="#">HMDB00806</a> | 1.66 | 0.011071 |
| X - 16071 #                                       | Unknown                                                 | Unknown                           |                        |                           | 1.66 | 0.018224 |
| pelargonate (9:0)                                 | Medium Chain Fatty Acid                                 | Lipid and fatty acid metabolism   | <a href="#">C01601</a> | <a href="#">HMDB00847</a> | 1.65 | 0.005994 |
| glycochenodeoxycholate                            | Primary Bile Acid Metabolism                            | Lipid and fatty acid metabolism   | <a href="#">C05466</a> | <a href="#">HMDB00637</a> | 1.65 | 0.031429 |
| inosine                                           | Purine Metabolism,<br>(Hypo)Xanthine/Inosine containing | Nucleotide metabolism             | <a href="#">C00294</a> | <a href="#">HMDB00195</a> | 1.64 | 0.010534 |
| palmitate (16:0)                                  | Long Chain Fatty Acid                                   | Lipid and fatty acid metabolism   | <a href="#">C00249</a> | <a href="#">HMDB00220</a> | 1.64 | 0.019589 |
| amphotericin B                                    | Drug                                                    | Xenobiotics                       | <a href="#">C06573</a> | <a href="#">HMDB14819</a> | 1.64 | 0.01243  |
| stearoyl-arachidonoyl-glycerophosphoinositol (1)* | Lysolipid                                               | Lipid and fatty acid metabolism   |                        |                           | 1.63 | 0.004849 |
| xanthine                                          | Purine Metabolism,<br>(Hypo)Xanthine/Inosine containing | Nucleotide metabolism             | <a href="#">C00385</a> | <a href="#">HMDB00292</a> | 1.63 | 0.035235 |
| 2-methylcitrate                                   | TCA Cycle                                               | Energy                            | <a href="#">C02225</a> | <a href="#">HMDB00379</a> | 1.62 | 0.038251 |
| 2'-deoxyuridine                                   | Pyrimidine Metabolism, Uracil containing                | Nucleotide metabolism             | <a href="#">C00526</a> | <a href="#">HMDB00012</a> | 1.62 | 0.048381 |
| nicotinamide                                      | Nicotinate and Nicotinamide Metabolism                  | Cofactors and Vitamins            | <a href="#">C00153</a> | <a href="#">HMDB01406</a> | 1.61 | 0.002197 |
| glutarate (pentanedioate)                         | Lysine Metabolism                                       | Amino acid and protein metabolism | <a href="#">C00489</a> | <a href="#">HMDB00661</a> | 1.6  | 0.005949 |
| heptanoate (7:0)                                  | Medium Chain Fatty Acid                                 | Lipid and fatty acid metabolism   | <a href="#">C17714</a> | <a href="#">HMDB00666</a> | 1.59 | 0.001447 |
| FMN                                               | Riboflavin Metabolism                                   | Cofactors and Vitamins            | <a href="#">C00061</a> | <a href="#">HMDB01520</a> | 1.59 | 0.035055 |
| deoxycholate                                      | Secondary Bile Acid Metabolism                          | Lipid and fatty acid metabolism   | <a href="#">C04483</a> | <a href="#">HMDB00626</a> | 1.59 | 0.025202 |
| N-acetylhistidine                                 | Histidine Metabolism                                    | Amino acid and protein metabolism | <a href="#">C02997</a> | <a href="#">HMDB32055</a> | 1.58 | 0.003764 |
| margarate (17:0)                                  | Long Chain Fatty Acid                                   | Lipid and fatty acid metabolism   |                        | <a href="#">HMDB02259</a> | 1.57 | 0.025139 |
| deoxycarnitine                                    | Carnitine Metabolism                                    | Lipid and fatty acid metabolism   | <a href="#">C01181</a> | <a href="#">HMDB01161</a> | 1.54 | 0.010411 |
| glycerol                                          | Glycerolipid Metabolism                                 | Lipid and fatty acid metabolism   | <a href="#">C00116</a> | <a href="#">HMDB00131</a> | 1.51 | 0.025842 |
| stearate (18:0)                                   | Long Chain Fatty Acid                                   | Lipid and fatty acid metabolism   | <a href="#">C01530</a> | <a href="#">HMDB00827</a> | 1.51 | 0.028664 |
| pyroglutamine*                                    | Glutamate Metabolism                                    | Amino acid and protein metabolism |                        |                           | 1.49 | 0.030919 |
| palmitoyl ethanolamide                            | Endocannabinoid                                         | Lipid and fatty acid metabolism   | <a href="#">C16512</a> | <a href="#">HMDB02100</a> | 1.49 | 0.04449  |

|                                   |                                                      |                                   |               |                  |      |          |
|-----------------------------------|------------------------------------------------------|-----------------------------------|---------------|------------------|------|----------|
| 2-piperidinone                    | Food Component/Plant                                 | Xenobiotics                       |               |                  | 1.48 | 0.011474 |
| choline                           | Phospholipid Metabolism                              | Lipid and fatty acid metabolism   | <u>C00114</u> | <u>HMDB00097</u> | 1.47 | 0.034488 |
| 3-hydroxyisobutyrate              | Leucine, Isoleucine and Valine Metabolism            | Amino acid and protein metabolism | <u>C06001</u> | <u>HMDB00336</u> | 1.46 | 0.008365 |
| N-acetylthreonine                 | Glycine, Serine and Threonine Metabolism             | Amino acid and protein metabolism | <u>C01118</u> | <u>METPA0134</u> | 1.43 | 0.017742 |
| xanthosine 5'-monophosphate (xmp) | Purine Metabolism, (Hypo)Xanthine/Inosine containing | Nucleotide metabolism             | <u>C00655</u> | <u>HMDB01554</u> | 0.27 | 0.001844 |
| guanosine 5'-triphosphate         | Purine Metabolism, Guanine containing                | Nucleotide metabolism             | <u>C00044</u> | <u>HMDB01273</u> | 0.24 | 0.029345 |
| uridine 5'-diphosphate (UDP)      | Pyrimidine Metabolism, Uracil containing             | Nucleotide metabolism             | <u>C00015</u> | <u>HMDB00295</u> | 0.22 | 0.025457 |
| uridine 5'-triphosphate (UTP)     | Pyrimidine Metabolism, Uracil containing             | Nucleotide metabolism             | <u>C00075</u> | <u>HMDB00285</u> | 0.19 | 0.02205  |
| phosphoethanolamine (PE)          | Phospholipid Metabolism                              | Lipid and fatty acid metabolism   | <u>C00346</u> | <u>HMDB00224</u> | 0.16 | 0.038751 |

341

342 \* Indicates compounds that have not been officially confirmed based on a standard, but we are confident in their identity

343

344 # Unidentified metabolites



345 **Supplementary Table E2C:** Differentially regulated metabolites between ASMCs from healthy smokers and healthy non-smokers under  
 346 unstimulated conditions  
 347

| Metabolite           | Sub-pathway                           | Super-pathway                     | KEGG                   | HMDB number               | Fold change | p value  |
|----------------------|---------------------------------------|-----------------------------------|------------------------|---------------------------|-------------|----------|
| 1-methyladenosine    | Purine Metabolism, Adenine containing | Nucleotide metabolism             | <a href="#">C02494</a> | <a href="#">HMDB03331</a> | 5.15        | 5.73E-05 |
| X - 12097 #          | Unknown                               | Unknown                           |                        |                           | 2.76        | 0.00188  |
| gamma-glutamyllysine | Gamma-glutamyl Amino Acid             | Amino acid and protein metabolism |                        | <a href="#">HMDB03869</a> | 1.93        | 0.009454 |
| X - 12688 #          | Unknown                               | Unknown                           |                        |                           | 0.43        | 0.000586 |
| prolylglutamate      | Dipeptide                             | Amino acid and protein metabolism |                        |                           | 0.29        | 0.007795 |

348  
 349 # Unidentified metabolites  
 350

351  
 352

353

354 **Supplementary Table E3A:** Differentially regulated metabolites between ASMCs from COPD patients and healthy non-smokers under TGF-  
 355  $\beta$ /FBS-stimulated conditions  
 356

| Metabolite                   | Sub-pathway                                      | Super-pathway                     | KEGG                   | HMDB number               | Fold change | p value  |
|------------------------------|--------------------------------------------------|-----------------------------------|------------------------|---------------------------|-------------|----------|
| prolylvaline                 | Dipeptide                                        | Amino acid and protein metabolism |                        |                           | 25.56       | 1.75E-08 |
| cytidine                     | Pyrimidine Metabolism, Cytidine containing       | Nucleotide metabolism             | <a href="#">C00475</a> | <a href="#">HMDB00089</a> | 10.26       | 0.009653 |
| X - 21861 #                  | Unknown                                          | Unknown                           |                        |                           | 10.02       | 0.000672 |
| X - 22216 #                  | Unknown                                          | Unknown                           |                        |                           | 8.73        | 0.040884 |
| X - 14838 #                  | Unknown                                          | Unknown                           |                        |                           | 5.44        | 0.011481 |
| X - 14380 #                  | Unknown                                          | Unknown                           |                        |                           | 4.38        | 0.021122 |
| X - 17299 #                  | Unknown                                          | Unknown                           |                        |                           | 4.05        | 0.013788 |
| kynurenine                   | Tryptophan Metabolism                            | Amino acid and protein metabolism | <a href="#">C00328</a> | <a href="#">HMDB00684</a> | 3.8         | 0.006948 |
| cystathionine                | Methionine, Cysteine, SAM and Taurine Metabolism | Amino acid and protein metabolism | <a href="#">C02291</a> | <a href="#">HMDB00099</a> | 3.72        | 0.006517 |
| 1-oleoylglycerophosphoserine | Lysolipid                                        | Lipid and fatty acid metabolism   |                        |                           | 3.66        | 0.002953 |
| 1-arachidonoyl-GPI* (20:4)*  | Lysolipid                                        | Lipid and fatty acid metabolism   |                        | <a href="#">HMDB61690</a> | 3.37        | 0.029812 |
| 2-aminoadipate               | Lysine Metabolism                                | Amino acid and protein metabolism | <a href="#">C00956</a> | <a href="#">HMDB00510</a> | 3.32        | 0.000256 |
| 2-hydroxystearate            | Fatty Acid, Monohydroxy                          | Lipid and fatty acid metabolism   | <a href="#">C03045</a> |                           | 3.1         | 0.000359 |
| 1-oleoyl-GPI (18:1)*         | Lysolipid                                        | Lipid and fatty acid metabolism   |                        |                           | 3.1         | 0.016291 |
| valylglutamate               | Dipeptide                                        | Amino acid and protein metabolism |                        |                           | 3.1         | 0.00182  |
| prolylhydroxyproline         | Urea cycle; Arginine and Proline Metabolism      | Amino acid and protein metabolism |                        | <a href="#">HMDB06695</a> | 3.09        | 0.0003   |
| X - 21755 #                  | Unknown                                          | Unknown                           |                        |                           | 2.99        | 2.58E-06 |
| valyltyrosine                | Dipeptide                                        | Amino acid and protein metabolism |                        |                           | 2.94        | 0.00821  |
| 2-hydroxyadipate             | Fatty Acid, Dicarboxylate                        | Lipid and fatty acid metabolism   | <a href="#">C02360</a> | <a href="#">HMDB00321</a> | 2.87        | 0.000592 |
| 2-hydroxypalmitate           | Fatty Acid, Monohydroxy                          | Lipid and fatty acid metabolism   |                        | <a href="#">HMDB31057</a> | 2.79        | 0.00428  |
| X - 23308 #                  | Unknown                                          | Unknown                           |                        |                           | 2.76        | 2.78E-05 |

|                                     |                                            |                                   |                        |                           |      |          |
|-------------------------------------|--------------------------------------------|-----------------------------------|------------------------|---------------------------|------|----------|
| thymidine                           | Pyrimidine Metabolism, Thymine containing  | Nucleotide metabolism             | <a href="#">C00214</a> | <a href="#">HMDB00273</a> | 2.76 | 0.01732  |
| AMP                                 | Purine Metabolism, Adenine containing      | Nucleotide metabolism             | <a href="#">C00020</a> | <a href="#">HMDB00045</a> | 2.75 | 0.029519 |
| cytidine 2',3'-cyclic monophosphate | Pyrimidine Metabolism, Cytidine containing | Nucleotide metabolism             | <a href="#">C02354</a> | <a href="#">HMDB11691</a> | 2.71 | 0.002479 |
| uridine-2',3'-cyclic monophosphate  | Pyrimidine Metabolism, Uracil containing   | Nucleotide metabolism             | <a href="#">C02355</a> | <a href="#">HMDB11640</a> | 2.68 | 0.00019  |
| 4-acetamidobutanoate                | Polyamine Metabolism                       | Amino acid and protein metabolism | <a href="#">C02946</a> | <a href="#">HMDB03681</a> | 2.63 | 0.002803 |
| X - 23086 #                         | Unknown                                    | Unknown                           |                        |                           | 2.63 | 7.15E-05 |
| saccharopine                        | Lysine Metabolism                          | Amino acid and protein metabolism | <a href="#">C00449</a> | <a href="#">HMDB00279</a> | 2.49 | 0.033937 |
| 2-hydroxydecanoate                  | Fatty Acid, Monohydroxy                    | Lipid and fatty acid metabolism   |                        |                           | 2.44 | 0.003145 |
| prolylglutamate                     | Dipeptide                                  | Amino acid and protein metabolism |                        |                           | 2.37 | 5.20E-05 |
| X - 15666 #                         | Unknown                                    | Unknown                           |                        |                           | 2.31 | 0.000794 |
| choline                             | Phospholipid Metabolism                    | Lipid and fatty acid metabolism   | <a href="#">C00114</a> | <a href="#">HMDB00097</a> | 2.29 | 0.003296 |
| 6-oxopiperidine-2-carboxylic acid   | Drug                                       | Xenobiotics                       |                        |                           | 2.28 | 0.000429 |
| glycylisoleucine                    | Dipeptide                                  | Amino acid and protein metabolism |                        | <a href="#">HMDB28844</a> | 2.23 | 0.01799  |
| docosatrienoate (22:3n3)            | Polyunsaturated Fatty Acid (n3 and n6)     | Lipid and fatty acid metabolism   | <a href="#">C16534</a> | <a href="#">HMDB02823</a> | 2.21 | 0.030842 |
| phosphocholine                      | Phospholipid Metabolism                    | Lipid and fatty acid metabolism   | <a href="#">C00588</a> | <a href="#">HMDB01565</a> | 2.2  | 3.31E-05 |
| gamma-glutamylphenylalanine         | Gamma-glutamyl Amino Acid                  | Amino acid and protein metabolism |                        | <a href="#">HMDB00594</a> | 2.19 | 0.035737 |
| histidylleucine                     | Dipeptide                                  | Amino acid and protein metabolism |                        |                           | 2.19 | 0.045504 |
| X - 14318 #                         | Unknown                                    | Unknown                           |                        |                           | 2.14 | 0.022413 |
| N-acetylhistidine                   | Histidine Metabolism                       | Amino acid and protein metabolism | <a href="#">C02997</a> | <a href="#">HMDB32055</a> | 2.13 | 0.00102  |
| caproate (6:0)                      | Medium Chain Fatty Acid                    | Lipid and fatty acid metabolism   | <a href="#">C01585</a> | <a href="#">HMDB00535</a> | 2.08 | 0.000494 |
| glutarate (pentanedioate)           | Lysine Metabolism                          | Amino acid and protein metabolism | <a href="#">C00489</a> | <a href="#">HMDB00661</a> | 2.08 | 0.001331 |
| X - 12688 #                         | Unknown                                    | Unknown                           |                        |                           | 2.07 | 5.42E-05 |
| N-acetyl-beta-alanine               | Pyrimidine Metabolism, Uracil containing   | Nucleotide metabolism             | <a href="#">C01073</a> |                           | 2.05 | 0.036724 |

|                                                |                                                  |                                   |                        |                           |      |          |
|------------------------------------------------|--------------------------------------------------|-----------------------------------|------------------------|---------------------------|------|----------|
| 1-methylnicotinamide                           | Nicotinate and Nicotinamide Metabolism           | Cofactors and Vitamins            | <a href="#">C02918</a> | <a href="#">HMDB00699</a> | 2.04 | 7.68E-06 |
| ribose 5-phosphate                             | Pentose Phosphate Pathway                        | Carbohydrate metabolism           | <a href="#">C00117</a> | <a href="#">HMDB01548</a> | 2.04 | 0.015261 |
| gamma-aminobutyrate (GABA)                     | Glutamate Metabolism                             | Amino acid and protein metabolism | <a href="#">C00334</a> | <a href="#">HMDB00112</a> | 2.03 | 0.034775 |
| imidazole propionate                           | Histidine Metabolism                             | Amino acid and protein metabolism |                        | <a href="#">HMDB02271</a> | 2.02 | 0.000588 |
| X - 17010 #                                    | Unknown                                          | Unknown                           |                        |                           | 2.02 | 0.004625 |
| X - 16271 #                                    | Unknown                                          | Unknown                           |                        |                           | 1.98 | 0.049729 |
| eicosenoate (20:1n9 or 1n11)                   | Long Chain Fatty Acid                            | Lipid and fatty acid metabolism   |                        | <a href="#">HMDB02231</a> | 1.96 | 0.018956 |
| streptomycin                                   | Drug                                             | Xenobiotics                       |                        |                           | 1.96 | 0.008618 |
| isobutyrylcarnitine (C4)                       | Leucine, Isoleucine and Valine Metabolism        | Amino acid and protein metabolism |                        | <a href="#">HMDB00736</a> | 1.94 | 0.009949 |
| myo-inositol                                   | Inositol Metabolism                              | Lipid and fatty acid metabolism   | <a href="#">C00137</a> | <a href="#">HMDB00211</a> | 1.94 | 0.012512 |
| glucuronate                                    | Aminosugar Metabolism                            | Carbohydrate metabolism           | <a href="#">C00191</a> | <a href="#">HMDB00127</a> | 1.94 | 0.003859 |
| valylvaline                                    | Dipeptide                                        | Amino acid and protein metabolism |                        |                           | 1.94 | 0.047909 |
| docosadienoate (22:2n6)                        | Polyunsaturated Fatty Acid (n3 and n6)           | Lipid and fatty acid metabolism   | <a href="#">C16533</a> | <a href="#">HMDB61714</a> | 1.92 | 0.023589 |
| galactonate                                    | Fructose, Mannose and Galactose Metabolism       | Carbohydrate metabolism           | <a href="#">C00880</a> | <a href="#">HMDB00565</a> | 1.87 | 0.030656 |
| vaccenate (18:1n7)                             | Long Chain Fatty Acid                            | Lipid and fatty acid metabolism   | <a href="#">C08367</a> | <a href="#">HMDB03231</a> | 1.87 | 0.005936 |
| X - 21343 #                                    | Unknown                                          | Unknown                           |                        |                           | 1.86 | 0.049896 |
| phosphate                                      | Oxidative Phosphorylation                        | Energy                            | <a href="#">C00009</a> | <a href="#">HMDB01429</a> | 1.86 | 0.001667 |
| uridine                                        | Pyrimidine Metabolism, Uracil containing         | Nucleotide metabolism             | <a href="#">C00299</a> | <a href="#">HMDB00296</a> | 1.86 | 0.003362 |
| scyllo-inositol                                | Inositol Metabolism                              | Lipid and fatty acid metabolism   | <a href="#">C06153</a> | <a href="#">HMDB06088</a> | 1.85 | 0.020454 |
| 1-methylguanosine                              | Purine Metabolism, Guanine containing            | Nucleotide metabolism             |                        | <a href="#">HMDB01563</a> | 1.84 | 0.045582 |
| palmitoyl-palmitoyl-glycerophosphocholine (2)* | Lysolipid                                        | Lipid and fatty acid metabolism   |                        |                           | 1.84 | 0.001084 |
| S-adenosylmethionine (SAM)                     | Methionine, Cysteine, SAM and Taurine Metabolism | Amino acid and protein metabolism | <a href="#">C00019</a> | <a href="#">HMDB01185</a> | 1.83 | 0.012262 |

|                                                |                                             |                                   |                        |                           |      |          |
|------------------------------------------------|---------------------------------------------|-----------------------------------|------------------------|---------------------------|------|----------|
| phenylacetyl glycine                           | Phenylalanine and Tyrosine Metabolism       | Amino acid and protein metabolism | <a href="#">C05598</a> | <a href="#">HMDB00821</a> | 1.83 | 0.010832 |
| 1-stearoylglycerophosphoserine*                | Lysolipid                                   | Lipid and fatty acid metabolism   |                        |                           | 1.83 | 0.03098  |
| hexanoylcarnitine (C6)                         | Fatty Acid Metabolism(Acyl Carnitine)       | Lipid and fatty acid metabolism   |                        | <a href="#">HMDB00705</a> | 1.82 | 0.037487 |
| erucate (22:1n9)                               | Long Chain Fatty Acid                       | Lipid and fatty acid metabolism   | <a href="#">C08316</a> | <a href="#">HMDB02068</a> | 1.82 | 0.039016 |
| arachidate (20:0)                              | Long Chain Fatty Acid                       | Lipid and fatty acid metabolism   | <a href="#">C06425</a> | <a href="#">HMDB02212</a> | 1.82 | 0.026736 |
| inositol 1-phosphate (I1P)                     | Inositol Metabolism                         | Lipid and fatty acid metabolism   | <a href="#">C04006</a> | <a href="#">HMDB00213</a> | 1.8  | 0.003649 |
| 1-docosahexaenoylglycerophosphoethanolamine*   | Lysolipid                                   | Lipid and fatty acid metabolism   |                        |                           | 1.8  | 0.017882 |
| gamma-glutamylleucine                          | Gamma-glutamyl Amino Acid                   | Amino acid and protein metabolism |                        | <a href="#">HMDB11171</a> | 1.77 | 0.036858 |
| pelargonate (9:0)                              | Medium Chain Fatty Acid                     | Lipid and fatty acid metabolism   | <a href="#">C01601</a> | <a href="#">HMDB00847</a> | 1.76 | 0.001717 |
| heptanoate (7:0)                               | Medium Chain Fatty Acid                     | Lipid and fatty acid metabolism   | <a href="#">C17714</a> | <a href="#">HMDB00666</a> | 1.75 | 0.011659 |
| pentadecanoate (15:0)                          | Long Chain Fatty Acid                       | Lipid and fatty acid metabolism   | <a href="#">C16537</a> | <a href="#">HMDB00826</a> | 1.75 | 0.007828 |
| X - 22776 #                                    | Unknown                                     | Unknown                           |                        |                           | 1.73 | 0.028896 |
| 5-oxoproline                                   | Glutathione Metabolism                      | Amino acid and protein metabolism | <a href="#">C01879</a> | <a href="#">HMDB00267</a> | 1.73 | 0.000473 |
| 10-heptadecenoate (17:1n7)                     | Long Chain Fatty Acid                       | Lipid and fatty acid metabolism   |                        | <a href="#">HMDB60038</a> | 1.72 | 0.047705 |
| palmitoyl-palmitoyl-glycerophosphocholine (1)* | Lysolipid                                   | Lipid and fatty acid metabolism   |                        |                           | 1.7  | 0.002635 |
| oleoyl-oleoyl-glycerophosphocholine (1)*       | Lysolipid                                   | Lipid and fatty acid metabolism   |                        |                           | 1.7  | 0.000587 |
| gamma-glutamylvaline                           | Gamma-glutamyl Amino Acid                   | Amino acid and protein metabolism |                        | <a href="#">HMDB11172</a> | 1.69 | 0.020424 |
| nicotinamide                                   | Nicotinate and Nicotinamide Metabolism      | Cofactors and Vitamins            | <a href="#">C00153</a> | <a href="#">HMDB01406</a> | 1.68 | 0.002557 |
| hydroxyproline                                 | Urea cycle; Arginine and Proline Metabolism | Amino acid and protein metabolism | <a href="#">C01157</a> | <a href="#">HMDB00725</a> | 1.67 | 0.00263  |
| pyridoxate                                     | Vitamin B6 Metabolism                       | Cofactors and Vitamins            | <a href="#">C00847</a> | <a href="#">HMDB00017</a> | 1.66 | 0.020969 |
| myristate (14:0)                               | Long Chain Fatty Acid                       | Lipid and fatty acid metabolism   | <a href="#">C06424</a> | <a href="#">HMDB00806</a> | 1.66 | 0.020166 |
| gamma-glutamylisoleucine*                      | Gamma-glutamyl Amino Acid                   | Amino acid and protein metabolism |                        | <a href="#">HMDB11170</a> | 1.59 | 0.03728  |

|                                                   |                                                      |                                   |                        |                           |      |          |
|---------------------------------------------------|------------------------------------------------------|-----------------------------------|------------------------|---------------------------|------|----------|
| cytidine 5'-monophosphate (5'-CMP)                | Pyrimidine Metabolism, Cytidine containing           | Nucleotide metabolism             | <a href="#">C00055</a> | <a href="#">HMDB00095</a> | 1.58 | 0.032795 |
| deoxycarnitine                                    | Carnitine Metabolism                                 | Lipid and fatty acid metabolism   | <a href="#">C01181</a> | <a href="#">HMDB01161</a> | 1.56 | 0.012617 |
| gulonic acid*                                     | Ascorbate and Aldarate Metabolism                    | Cofactors and Vitamins            |                        |                           | 1.53 | 0.012559 |
| pyridoxal                                         | Vitamin B6 Metabolism                                | Cofactors and Vitamins            | <a href="#">C00250</a> | <a href="#">HMDB01545</a> | 1.49 | 0.036953 |
| stearoyl-arachidonoyl-glycerophosphoinositol (2)* | Lysolipid                                            | Lipid and fatty acid metabolism   |                        |                           | 1.44 | 0.010192 |
| X - 13529 #                                       | Unknown                                              | Unknown                           |                        |                           | 1.35 | 0.038874 |
| 5-phosphoribosyl diphosphate (PRPP)               | Pentose Phosphate Pathway                            | Carbohydrate metabolism           | <a href="#">C00119</a> | <a href="#">HMDB00280</a> | 0.58 | 0.039071 |
| X - 21757 #                                       | Unknown                                              | Unknown                           |                        |                           | 0.54 | 0.000329 |
| xanthosine 5'-monophosphate (xmp)                 | Purine Metabolism, (Hypo)Xanthine/Inosine containing | Nucleotide metabolism             | <a href="#">C00655</a> | <a href="#">HMDB01554</a> | 0.49 | 0.017049 |
| sorbitol                                          | Fructose, Mannose and Galactose Metabolism           | Carbohydrate metabolism           | <a href="#">C00794</a> | <a href="#">HMDB00247</a> | 0.42 | 0.028928 |
| 1-methyladenosine                                 | Purine Metabolism, Adenine containing                | Nucleotide metabolism             | <a href="#">C02494</a> | <a href="#">HMDB03331</a> | 0.41 | 0.000283 |
| leucylisoleucine                                  | Dipeptide                                            | Amino acid and protein metabolism |                        |                           | 0.4  | 0.043145 |
| ergothioneine                                     | Food Component/Plant                                 | Xenobiotics                       | <a href="#">C05570</a> | <a href="#">HMDB03045</a> | 0.35 | 0.00392  |
| CDP-ethanolamine                                  | Phospholipid Metabolism                              | Lipid and fatty acid metabolism   | <a href="#">C00570</a> | <a href="#">HMDB01564</a> | 0.29 | 0.001941 |
| maltopentaose                                     | Glycogen Metabolism                                  | Carbohydrate metabolism           | <a href="#">C06218</a> | <a href="#">HMDB12254</a> | 0.21 | 0.047814 |
| X - 13871 #                                       | Unknown                                              | Unknown                           |                        |                           | 0.19 | 0.046547 |
| N6-succinyladenosine                              | Purine Metabolism, Adenine containing                | Nucleotide metabolism             |                        | <a href="#">HMDB00912</a> | 0.18 | 0.000588 |
| phosphoethanolamine (PE)                          | Phospholipid Metabolism                              | Lipid and fatty acid metabolism   | <a href="#">C00346</a> | <a href="#">HMDB00224</a> | 0.03 | 0.014636 |

357

358 \* Indicates compounds that have not been officially confirmed based on a standard, but we are confident in their identity

359

360 # Unidentified metabolites

361 **Supplementary Table E3B:** Differentially regulated metabolites between ASMCs from COPD patients and healthy smokers under TGF-  
 362  $\beta$ /FBS-stimulated conditions  
 363

| Metabolite                          | Sub-pathway                                | Super-pathway                     | KEGG                   | HMDB number               | Fold change | p value  |
|-------------------------------------|--------------------------------------------|-----------------------------------|------------------------|---------------------------|-------------|----------|
| 5'- GMP                             | Purine Metabolism, Guanine containing      | Nucleotide Metabolism             | <a href="#">C00144</a> | <a href="#">HMDB01397</a> | 3.68        | 0.011791 |
| Gluconate                           | Food Component/Plant                       | Xenobiotics                       | <a href="#">C00257</a> | <a href="#">HMDB00625</a> | 2.89        | 0.047083 |
| AMP                                 | Purine Metabolism, Adenine containing      | Nucleotide Metabolism             | <a href="#">C00020</a> | <a href="#">HMDB00045</a> | 2.73        | 0.030071 |
| 1-oleoylglycerophosphoserine        | Lysolipid                                  | Lipid and fatty acid metabolism   |                        |                           | 2.54        | 0.010056 |
| 2-hydroxydecanoate                  | Fatty Acid, Monohydroxy                    | Lipid and fatty acid metabolism   |                        |                           | 2.48        | 0.002871 |
| X - 17717 #                         | Unknown                                    | Unknown                           |                        |                           | 2.44        | 0.04793  |
| 2-hydroxypalmitate                  | Fatty Acid, Monohydroxy                    | Lipid and fatty acid metabolism   |                        | <a href="#">HMDB31057</a> | 2.43        | 0.007753 |
| Kynurenine                          | Tryptophan Metabolism                      | Amino acid and protein metabolism | <a href="#">C00328</a> | <a href="#">HMDB00684</a> | 2.42        | 0.025845 |
| X - 17677 #                         | Unknown                                    | Unknown                           |                        |                           | 2.4         | 0.047381 |
| uridine-2',3'-cyclic monophosphate  | Pyrimidine Metabolism, Uracil containing   | Nucleotide Metabolism             | <a href="#">C02355</a> | <a href="#">HMDB11640</a> | 2.4         | 0.000377 |
| Glycylisoleucine                    | Dipeptide                                  | Amino acid and protein metabolism |                        | <a href="#">HMDB28844</a> | 2.26        | 0.017202 |
| UMP                                 | Pyrimidine Metabolism, Uracil containing   | Nucleotide Metabolism             | <a href="#">C00105</a> | <a href="#">HMDB00288</a> | 2.19        | 0.043287 |
| 2-hydroxystearate                   | Fatty Acid, Monohydroxy                    | Lipid and fatty acid metabolism   | <a href="#">C03045</a> |                           | 2.18        | 0.002481 |
| X - 23827 #                         | Unknown                                    | Unknown                           |                        |                           | 2.11        | 0.046137 |
| ribose 5-phosphate                  | Pentose Phosphate Pathway                  | Carbohydrate metabolism           | <a href="#">C00117</a> | <a href="#">HMDB01548</a> | 2.03        | 0.015762 |
| docosatrienoate (22:3n3)            | Polyunsaturated Fatty Acid (n3 and n6)     | Lipid and fatty acid metabolism   | <a href="#">C16534</a> | <a href="#">HMDB02823</a> | 2           | 0.046154 |
| Prolylvaline                        | Dipeptide                                  | Amino acid and protein metabolism |                        |                           | 1.99        | 8.33E-05 |
| N1-methylguanosine                  | Purine Metabolism, Guanine containing      | Nucleotide Metabolism             |                        | <a href="#">HMDB01563</a> | 1.94        | 0.03556  |
| cytidine 2',3'-cyclic monophosphate | Pyrimidine Metabolism, Cytidine containing | Nucleotide Metabolism             | <a href="#">C02354</a> | <a href="#">HMDB11691</a> | 1.94        | 0.014613 |
| 2-aminoadipate                      | Lysine Metabolism                          | Amino acid and protein metabolism | <a href="#">C00956</a> | <a href="#">HMDB00510</a> | 1.91        | 0.006114 |
| palmitoleate (16:1n7)               | Long Chain Fatty Acid                      | Lipid and fatty acid metabolism   | <a href="#">C08362</a> | <a href="#">HMDB03229</a> | 1.89        | 0.040829 |

|                                                |                                             |                                   |                        |                           |      |          |
|------------------------------------------------|---------------------------------------------|-----------------------------------|------------------------|---------------------------|------|----------|
| 3-methylhistidine                              | Histidine Metabolism                        | Amino acid and protein metabolism | <a href="#">C01152</a> | <a href="#">HMDB00479</a> | 1.89 | 0.046537 |
| Adenosine                                      | Purine Metabolism, Adenine containing       | Nucleotide Metabolism             | <a href="#">C00212</a> | <a href="#">HMDB00050</a> | 1.88 | 0.027972 |
| 4-methyl-2-oxopentanoate                       | Leucine, Isoleucine and Valine Metabolism   | Amino acid and protein metabolism | <a href="#">C00233</a> | <a href="#">HMDB00695</a> | 1.87 | 0.019706 |
| Glucuronate                                    | Aminosugar Metabolism                       | Carbohydrate metabolism           | <a href="#">C00191</a> | <a href="#">HMDB00127</a> | 1.87 | 0.00512  |
| Phenylacetylglycine                            | Phenylalanine and Tyrosine Metabolism       | Amino acid and protein metabolism | <a href="#">C05598</a> | <a href="#">HMDB00821</a> | 1.86 | 0.009515 |
| 1-stearoylglycerophosphoserine*                | Lysolipid                                   | Lipid and fatty acid metabolism   |                        |                           | 1.85 | 0.029205 |
| X - 14318 #                                    | Unknown                                     | Unknown                           |                        |                           | 1.83 | 0.047725 |
| Uridine                                        | Pyrimidine Metabolism, Uracil containing    | Nucleotide Metabolism             | <a href="#">C00299</a> | <a href="#">HMDB00296</a> | 1.82 | 0.004009 |
| palmitoyl-palmitoyl-glycerophosphocholine (1)* | Lysolipid                                   | Lipid and fatty acid metabolism   |                        |                           | 1.81 | 0.001394 |
| N-acetylarginine                               | Urea cycle; Arginine and Proline Metabolism | Amino acid and protein metabolism | <a href="#">C02562</a> | <a href="#">HMDB04620</a> | 1.81 | 0.011887 |
| myo-inositol                                   | Inositol Metabolism                         | Lipid and fatty acid metabolism   | <a href="#">C00137</a> | <a href="#">HMDB00211</a> | 1.8  | 0.020213 |
| oleoyl-linoleoyl-glycerophosphoinositol (1)*   | Lysolipid                                   | Lipid and fatty acid metabolism   |                        |                           | 1.78 | 0.013668 |
| vaccenate (18:1n7)                             | Long Chain Fatty Acid                       | Lipid and fatty acid metabolism   | <a href="#">C08367</a> | <a href="#">HMDB03231</a> | 1.77 | 0.00925  |
| 4-hydroxybutyrate (GHB)                        | Fatty Acid, Monohydroxy                     | Lipid and fatty acid metabolism   | <a href="#">C00989</a> | <a href="#">HMDB00710</a> | 1.77 | 0.004181 |
| 2-hydroxyadipate                               | Fatty Acid, Dicarboxylate                   | Lipid and fatty acid metabolism   | <a href="#">C02360</a> | <a href="#">HMDB00321</a> | 1.76 | 0.01234  |
| X - 22776 #                                    | Unknown                                     | Unknown                           |                        |                           | 1.74 | 0.028185 |
| oleate (18:1n9)                                | Long Chain Fatty Acid                       | Lipid and fatty acid metabolism   | <a href="#">C00712</a> | <a href="#">HMDB00207</a> | 1.74 | 0.020615 |
| Galactonate                                    | Fructose, Mannose and Galactose Metabolism  | Carbohydrate metabolism           | <a href="#">C00880</a> | <a href="#">HMDB00565</a> | 1.73 | 0.047164 |
| X - 17010 #                                    | Unknown                                     | Unknown                           |                        |                           | 1.73 | 0.014483 |
| caproate (6:0)                                 | Medium Chain Fatty Acid                     | Lipid and fatty acid metabolism   | <a href="#">C01585</a> | <a href="#">HMDB00535</a> | 1.73 | 0.002881 |
| Glycerol                                       | Glycerolipid Metabolism                     | Lipid and fatty acid metabolism   | <a href="#">C00116</a> | <a href="#">HMDB00131</a> | 1.72 | 0.004759 |
| 3-methyl-2-oxovalerate                         | Leucine, Isoleucine and Valine Metabolism   | Amino acid and protein metabolism | <a href="#">C00671</a> | <a href="#">HMDB03736</a> | 1.69 | 0.045223 |
| inositol 1-phosphate (I1P)                     | Inositol Metabolism                         | Lipid and fatty acid metabolism   | <a href="#">C04006</a> | <a href="#">HMDB00213</a> | 1.69 | 0.006313 |



|                                                |                                                  |                                   |                        |                           |      |          |
|------------------------------------------------|--------------------------------------------------|-----------------------------------|------------------------|---------------------------|------|----------|
| eicosenoate (20:1n9 or 1n11)                   | Long Chain Fatty Acid                            | Lipid and fatty acid metabolism   |                        | <a href="#">HMDB02231</a> | 1.69 | 0.04608  |
| scyllo-inositol                                | Inositol Metabolism                              | Lipid and fatty acid metabolism   | <a href="#">C06153</a> | <a href="#">HMDB06088</a> | 1.66 | 0.042129 |
| myristoleate (14:1n5)                          | Long Chain Fatty Acid                            | Lipid and fatty acid metabolism   | <a href="#">C08322</a> | <a href="#">HMDB02000</a> | 1.66 | 0.033387 |
| N6-carbamoylthreonyladenosine                  | Purine Metabolism, Adenine containing            | Nucleotide Metabolism             |                        | <a href="#">HMDB41623</a> | 1.65 | 0.018591 |
| N-acetylvaline                                 | Leucine, Isoleucine and Valine Metabolism        | Amino acid and protein metabolism |                        | <a href="#">HMDB11757</a> | 1.64 | 0.017533 |
| isobutyrylcarnitine (C4)                       | Leucine, Isoleucine and Valine Metabolism        | Amino acid and protein metabolism |                        | <a href="#">HMDB00736</a> | 1.62 | 0.035606 |
| cytidine 5'-monophosphate (5'-CMP)             | Pyrimidine Metabolism, Cytidine containing       | Nucleotide Metabolism             | <a href="#">C00055</a> | <a href="#">HMDB00095</a> | 1.62 | 0.026801 |
| methionine sulfone                             | Methionine, Cysteine, SAM and Taurine Metabolism | Amino acid and protein metabolism |                        | <a href="#">HMDB59805</a> | 1.59 | 0.01332  |
| Hydroxyproline                                 | Urea cycle; Arginine and Proline Metabolism      | Amino acid and protein metabolism | <a href="#">C01157</a> | <a href="#">HMDB00725</a> | 1.58 | 0.005189 |
| 6-oxopiperidine-2-carboxylic acid              | Drug                                             | Xenobiotics                       |                        |                           | 1.58 | 0.011554 |
| glutarate (pentanedioate)                      | Lysine Metabolism                                | Amino acid and protein metabolism | <a href="#">C00489</a> | <a href="#">HMDB00661</a> | 1.58 | 0.014867 |
| palmitoyl-palmitoyl-glycerophosphocholine (2)* | Lysolipid                                        | Lipid and fatty acid metabolism   |                        |                           | 1.56 | 0.006706 |
| Deoxycarnitine                                 | Carnitine Metabolism                             | Lipid and fatty acid metabolism   | <a href="#">C01181</a> | <a href="#">HMDB01161</a> | 1.56 | 0.012191 |
| X - 19561 #                                    | Unknown                                          | Unknown                           |                        |                           | 1.53 | 0.015144 |
| heptanoate (7:0)                               | Medium Chain Fatty Acid                          | Lipid and fatty acid metabolism   | <a href="#">C17714</a> | <a href="#">HMDB00666</a> | 1.53 | 0.035617 |
| 5-oxoproline                                   | Glutathione Metabolism                           | Amino acid and protein metabolism | <a href="#">C01879</a> | <a href="#">HMDB00267</a> | 1.49 | 0.003611 |
| Prolylhydroxyproline                           | Urea cycle; Arginine and Proline Metabolism      | Amino acid and protein metabolism |                        | <a href="#">HMDB06695</a> | 1.48 | 0.04446  |
| 3-(4-hydroxyphenyl)lactate (HPLA)              | Phenylalanine and Tyrosine Metabolism            | Amino acid and protein metabolism | <a href="#">C03672</a> | <a href="#">HMDB00755</a> | 1.47 | 0.029697 |
| X - 15666 #                                    | Unknown                                          | Unknown                           |                        |                           | 1.47 | 0.034405 |
| imidazole propionate                           | Histidine Metabolism                             | Amino acid and protein metabolism |                        | <a href="#">HMDB02271</a> | 1.41 | 0.026828 |
| X - 22102 #                                    | Unknown                                          | Unknown                           |                        |                           | 1.4  | 0.021831 |
| X - 13529 #                                    | Unknown                                          | Unknown                           |                        |                           | 1.35 | 0.039876 |
| Succinate                                      | TCA Cycle                                        | Energy                            | <a href="#">C00042</a> | <a href="#">HMDB00254</a> | 0.67 | 0.033072 |

|                              |                     |                                   |               |                  |      |          |
|------------------------------|---------------------|-----------------------------------|---------------|------------------|------|----------|
| creatine phosphate           | Creatine Metabolism | Amino acid and protein metabolism | <u>C02305</u> | <u>HMDB01511</u> | 0.42 | 0.03378  |
| X - 16932 #                  | Unknown             | Unknown                           |               |                  | 0.36 | 0.044638 |
| 6-keto prostaglandin F1alpha | Eicosanoid          | Lipid and fatty acid metabolism   | <u>C05961</u> | <u>HMDB02886</u> | 0.3  | 0.048733 |
| prostaglandin F2alpha        | Eicosanoid          | Lipid and fatty acid metabolism   | <u>C00639</u> | <u>HMDB01139</u> | 0.21 | 0.045729 |

364

365

366

367

368

369

\* Indicates compounds that have not been officially confirmed based on a standard, but we are confident in their identity

# Unidentified metabolites

370 **Supplementary Table E3C:** Differentially regulated metabolites between ASMCs from healthy smokers and healthy non-smokers under TGF-  
 371  $\beta$ /FBS-stimulated conditions

372

| Metabolite                       | Sub-pathway                               | Super-pathway                     | KEGG                   | HMDB number               | Fold change | p value  |
|----------------------------------|-------------------------------------------|-----------------------------------|------------------------|---------------------------|-------------|----------|
| prolylvaline                     | Dipeptide                                 | Amino acid and protein metabolism |                        |                           | 12.85       | 0.000172 |
| X - 23308 #                      | Unknown                                   | Unknown                           |                        |                           | 2.66        | 5.34E-05 |
| X - 21755 #                      | Unknown                                   | Unknown                           |                        |                           | 2.55        | 5.01E-05 |
| prolylglutamate                  | Dipeptide                                 | Amino acid and protein metabolism |                        |                           | 2.02        | 0.000961 |
| X - 12688 #                      | Unknown                                   | Unknown                           |                        |                           | 1.89        | 0.000365 |
| 1-methylnicotinamide             | Nicotinate and Nicotinamide Metabolism    | Cofactors and Vitamins            | <a href="#">C02918</a> | <a href="#">HMDB00699</a> | 1.71        | 0.000479 |
| beta-hydroxyisovaleroylcarnitine | Leucine, Isoleucine and Valine Metabolism | Amino acid and protein metabolism |                        |                           | 0.44        | 0.008008 |
| X - 21757 #                      | Unknown                                   | Unknown                           |                        |                           | 0.43        | 3.96E-05 |
| 1-methyladenosine                | Purine Metabolism, Adenine containing     | Nucleotide Metabolism             | <a href="#">C02494</a> | <a href="#">HMDB03331</a> | 0.22        | 1.41E-05 |
| N6-succinyladenosine             | Purine Metabolism, Adenine containing     | Nucleotide Metabolism             |                        | <a href="#">HMDB00912</a> | 0.14        | 0.000378 |

373

374 # Unidentified metabolites

375

**Supplementary Table E4:** Differentially regulated pathways between unstimulated ASMCs from COPD patients and healthy non-smokers

| <b>Pathway</b>                                      | <b>Raw p value</b> | <b>Adj p val</b> |
|-----------------------------------------------------|--------------------|------------------|
| Lysine degradation                                  | 5.23E-06           | 0.00046007       |
| ABC transporters                                    | 0.0001308          | 0.00383775       |
| Arginine biosynthesis                               | 0.0002396          | 0.00501302       |
| Propanoate metabolism                               | 0.0002848          | 0.00501302       |
| Fatty acid biosynthesis                             | 0.0004187          | 0.00518382       |
| Pyrimidine metabolism                               | 0.0004459          | 0.00518382       |
| Glutathione metabolism                              | 0.0007073          | 0.00691533       |
| Ubiquinone and other terpenoid-quinone biosynthesis | 0.0010352          | 0.00697883       |
| Tyrosine metabolism                                 | 0.0010415          | 0.00697883       |
| Protein digestion and absorption                    | 0.0010918          | 0.00697883       |
| Lysine biosynthesis                                 | 0.0011533          | 0.00697883       |
| Arginine and proline metabolism                     | 0.0024609          | 0.01353468       |
| Fatty acid degradation                              | 0.0029899          | 0.01547725       |
| Biosynthesis of amino acids                         | 0.0048843          | 0.0231622        |
| Histidine metabolism                                | 0.0052108          | 0.0231622        |
| Purine metabolism                                   | 0.0052743          | 0.0231622        |
| beta-Alanine metabolism                             | 0.0061421          | 0.0231622        |
| Pantothenate and CoA biosynthesis                   | 0.0061589          | 0.0231622        |
| Inositol phosphate metabolism                       | 0.0071217          | 0.0231622        |
| Phosphatidylinositol signaling system               | 0.0072895          | 0.0231622        |
| Nicotinate and nicotinamide metabolism              | 0.007515           | 0.0231622        |
| Vitamin digestion and absorption                    | 0.007633           | 0.0231622        |
| Valine, leucine and isoleucine degradation          | 0.0101671          | 0.02795946       |
| Oxidative phosphorylation                           | 0.0109523          | 0.02920601       |
| Parkinson's disease                                 | 0.0113772          | 0.02944683       |
| Mineral absorption                                  | 0.0124012          | 0.03118012       |
| D-Arginine and D-ornithine metabolism               | 0.0133456          | 0.03262256       |
| Galactose metabolism                                | 0.0145748          | 0.03380623       |
| Primary bile acid biosynthesis                      | 0.0172494          | 0.0371046        |
| Sphingolipid metabolism                             | 0.0172858          | 0.0371046        |
| Sphingolipid signaling pathway                      | 0.0172874          | 0.0371046        |
| Glycerophospholipid metabolism                      | 0.0191965          | 0.03928584       |
| Phenylalanine metabolism                            | 0.0216698          | 0.04333955       |
| Cysteine and methionine metabolism                  | 0.0243639          | 0.04726706       |
| Sulfur metabolism                                   | 0.0252449          | 0.04726706       |
| 2-Oxocarboxylic acid metabolism                     | 0.0267629          | 0.04906537       |

ad p val, adjusted p value

**Supplementary Table E5:** Differentially regulated pathways between TGF- $\beta$ /FBS-treated ASMCs from COPD patients and healthy non-smokers

| Pathway name                                | Raw p value | Adj p val  |
|---------------------------------------------|-------------|------------|
| Bile secretion                              | 7.81E-06    | 0.00062455 |
| Arginine and proline metabolism             | 3.09E-05    | 0.00097489 |
| Metabolic pathways                          | 3.66E-05    | 0.00097489 |
| Nicotinate and nicotinamide metabolism      | 5.74E-05    | 0.00114804 |
| Choline metabolism in cancer                | 7.57E-05    | 0.00121045 |
| Mineral absorption                          | 0.0002696   | 0.00228165 |
| Lysine degradation                          | 0.0002852   | 0.00228165 |
| Oxidative phosphorylation                   | 0.0004849   | 0.00352678 |
| Pyrimidine metabolism                       | 0.0008483   | 0.00565556 |
| Glutathione metabolism                      | 0.0012638   | 0.00722186 |
| Lysine biosynthesis                         | 0.0013881   | 0.00731208 |
| Glycine, serine and threonine metabolism    | 0.0014624   | 0.00731208 |
| Histidine metabolism                        | 0.0020719   | 0.00939947 |
| Biosynthesis of amino acids                 | 0.0021149   | 0.00939947 |
| beta-Alanine metabolism                     | 0.0025672   | 0.01026894 |
| Ascorbate and aldarate metabolism           | 0.0039441   | 0.01502533 |
| Inositol phosphate metabolism               | 0.0048976   | 0.01712414 |
| Cholinergic synapse                         | 0.0049232   | 0.01712414 |
| Fatty acid degradation                      | 0.0062185   | 0.02072831 |
| Biosynthesis of secondary metabolites       | 0.0065611   | 0.02099544 |
| Vitamin digestion and absorption            | 0.0072224   | 0.02222268 |
| Phosphatidylinositol signaling system       | 0.00921     | 0.02688649 |
| Amino sugar and nucleotide sugar metabolism | 0.0117956   | 0.03072879 |
| Pentose and glucuronate interconversions    | 0.0119074   | 0.03072879 |
| Vitamin B6 metabolism                       | 0.0128797   | 0.03219929 |
| Cysteine and methionine metabolism          | 0.0133658   | 0.03240189 |
| Parkinson's disease                         | 0.0164849   | 0.03878805 |
| Fatty acid biosynthesis                     | 0.0252056   | 0.05487038 |
| Biosynthesis of unsaturated fatty acids     | 0.0253776   | 0.05487038 |

Adj p val, adjusted p value

**Supplementary Table E6:** Differentially regulated pathways between unstimulated ASMCs from COPD patients and healthy smokers

| <b>Pathway name</b>                        | <b>Raw p value</b> | <b>Adj p value</b> |
|--------------------------------------------|--------------------|--------------------|
| Fatty acid biosynthesis                    | 0.0003182          | 0.00954266         |
| Glycerophospholipid metabolism             | 0.0005229          | 0.00954266         |
| Mineral absorption                         | 0.0005881          | 0.00954266         |
| Parkinson's disease                        | 0.0007491          | 0.00965852         |
| Cysteine and methionine metabolism         | 0.0008049          | 0.00965852         |
| Arginine and proline metabolism            | 0.0012855          | 0.01153504         |
| Oxidative phosphorylation                  | 0.0013217          | 0.01153504         |
| Sphingolipid metabolism                    | 0.0020112          | 0.01266583         |
| Sphingolipid signaling pathway             | 0.0020162          | 0.01266583         |
| Phosphatidylinositol signaling system      | 0.0020697          | 0.01266583         |
| Propanoate metabolism                      | 0.0035304          | 0.01694613         |
| Sulfur metabolism                          | 0.0041658          | 0.01904358         |
| Nicotinate and nicotinamide metabolism     | 0.0047659          | 0.02054418         |
| Vitamin digestion and absorption           | 0.0051152          | 0.02054418         |
| Lysine degradation                         | 0.005136           | 0.02054418         |
| Valine, leucine and isoleucine degradation | 0.0077669          | 0.0286778          |
| Choline metabolism in cancer               | 0.009637           | 0.03304098         |
| ABC transporters                           | 0.0135363          | 0.04071158         |
| Metabolic pathways                         | 0.0144729          | 0.04210301         |
| Pantothenate and CoA biosynthesis          | 0.0152956          | 0.04217665         |
| Fatty acid degradation                     | 0.0158018          | 0.04217665         |
| Biosynthesis of unsaturated fatty acids    | 0.0169974          | 0.04294092         |
| Retrograde endocannabinoid signaling       | 0.0183808          | 0.04384023         |
| Pyrimidine metabolism                      | 0.0185627          | 0.04384023         |
| beta-Alanine metabolism                    | 0.018903           | 0.04384023         |
| Inositol phosphate metabolism              | 0.0193468          | 0.04384023         |
| Secondary bile acid biosynthesis           | 0.0211561          | 0.04530641         |
| Tryptophan metabolism                      | 0.0212374          | 0.04530641         |
| Bile secretion                             | 0.0234229          | 0.0488825          |
| African trypanosomiasis                    | 0.0243746          | 0.0496986          |
| Protein digestion and absorption           | 0.0248493          | 0.0496986          |

Adj p val, adjusted p value

**Supplementary Table E7:** Differentially regulated pathways between TGF- $\beta$ /FBS-stimulated ASMCs from COPD patients and healthy smokers

| Pathway name                                | Raw p value | Adj p value |
|---------------------------------------------|-------------|-------------|
| Pyrimidine metabolism                       | 0.0001584   | 0.01393801  |
| Ascorbate and aldarate metabolism           | 0.0027011   | 0.04700726  |
| Pentose and glucuronate interconversions    | 0.0031293   | 0.04700726  |
| Glutathione metabolism                      | 0.0052065   | 0.04700726  |
| Purine metabolism                           | 0.0058171   | 0.04700726  |
| Regulation of lipolysis in adipocytes       | 0.0059663   | 0.04700726  |
| Valine, leucine and isoleucine degradation  | 0.0064451   | 0.04700726  |
| Valine, leucine and isoleucine biosynthesis | 0.006754    | 0.04700726  |
| Inositol phosphate metabolism               | 0.0069662   | 0.04700726  |
| Phosphatidylinositol signaling system       | 0.0084747   | 0.04700726  |
| ABC transporters                            | 0.0088066   | 0.04700726  |
| Glycerolipid metabolism                     | 0.0088263   | 0.04700726  |
| Retrograde endocannabinoid signaling        | 0.0096782   | 0.04700726  |
| Metabolic pathways                          | 0.0111355   | 0.04700726  |
| Amino sugar and nucleotide sugar metabolism | 0.011763    | 0.04700726  |
| Starch and sucrose metabolism               | 0.0118735   | 0.04700726  |
| Biosynthesis of amino acids                 | 0.012979    | 0.04700726  |
| Glyoxylate and dicarboxylate metabolism     | 0.0163473   | 0.04700726  |
| Propanoate metabolism                       | 0.0165134   | 0.04700726  |
| Central carbon metabolism in cancer         | 0.0166335   | 0.04700726  |
| Pyruvate metabolism                         | 0.0168307   | 0.04700726  |
| Sulfur metabolism                           | 0.0169254   | 0.04700726  |
| Alanine, aspartate and glutamate metabolism | 0.0169807   | 0.04700726  |
| Lysine degradation                          | 0.0170325   | 0.04700726  |
| Glucagon signaling pathway                  | 0.0171112   | 0.04700726  |
| Citrate cycle (TCA cycle)                   | 0.017771    | 0.04700726  |
| Fatty acid biosynthesis                     | 0.0178669   | 0.04700726  |
| Oxidative phosphorylation                   | 0.0186961   | 0.04700726  |
| Biosynthesis of unsaturated fatty acids     | 0.0196661   | 0.04733969  |
| Galactose metabolism                        | 0.0202581   | 0.04733969  |

Adj p val, adjusted p value

**Supplementary Table E8:** Differences in medium and long chain fatty acid levels between ASMCs from healthy non-smokers, healthy smokers and patients with COPD (fold-change)

| Sub Pathway             | Biochemical Name           | KEGG number            | HMDB number               | Healthy smokers vs. Healthy non-smokers (0h) | COPD vs. Healthy non-smokers (0h) | COPD vs. Healthy smokers (0h) | Healthy smokers vs. Healthy non-smokers untreated (48h) | COPD vs. Healthy non-smokers untreated (48h) | COPD vs. Healthy smokers untreated (48h) | Healthy smokers vs. Healthy non-smokers TGF-β/FBS (48h) | COPD vs. Healthy non-smokers TGF-β/FBS (48h) | COPD vs. Healthy smokers TGF-β/FBS (48h) |
|-------------------------|----------------------------|------------------------|---------------------------|----------------------------------------------|-----------------------------------|-------------------------------|---------------------------------------------------------|----------------------------------------------|------------------------------------------|---------------------------------------------------------|----------------------------------------------|------------------------------------------|
| Medium Chain Fatty Acid | caproate (6:0)             | <a href="#">C01585</a> | <a href="#">HMDB00535</a> | 0.83                                         | 1.44                              | 1.74                          | 0.99                                                    | 2.08                                         | 2.09                                     | 1.2                                                     | 2.08                                         | 1.73                                     |
|                         | heptanoate (7:0)           | <a href="#">C17714</a> | <a href="#">HMDB00666</a> | 0.72                                         | 2.01                              | 2.8                           | 1.06                                                    | 1.69                                         | 1.59                                     | 1.14                                                    | 1.75                                         | 1.53                                     |
|                         | caprylate (8:0)            | <a href="#">C06423</a> | <a href="#">HMDB00482</a> | 1.14                                         | 1.86                              | 1.63                          | 1.2                                                     | 2.79                                         | 2.33                                     | 1.01                                                    | 1.78                                         | 1.76                                     |
|                         | pelargonate (9:0)          | <a href="#">C01601</a> | <a href="#">HMDB00847</a> | 1.11                                         | 1.51                              | 1.36                          | 0.92                                                    | 1.52                                         | 1.65                                     | 1.21                                                    | 1.76                                         | 1.46                                     |
|                         | 5-dodecenoate (12:1n7)     |                        | <a href="#">HMDB00529</a> | 0.87                                         | 0.62                              | 0.71                          | 0.94                                                    | 1.36                                         | 1.44                                     | 1.33                                                    | 1.43                                         | 1.08                                     |
| Long Chain Fatty Acid   | myristate (14:0)           | <a href="#">C06424</a> | <a href="#">HMDB00806</a> | 1.05                                         | 1.4                               | 1.33                          | 0.95                                                    | 1.58                                         | 1.66                                     | 1.2                                                     | 1.66                                         | 1.38                                     |
|                         | myristoleate (14:1n5)      | <a href="#">C08322</a> | <a href="#">HMDB02000</a> | 0.78                                         | 1.25                              | 1.6                           | 1.03                                                    | 2.09                                         | 2.03                                     | 0.88                                                    | 1.45                                         | 1.66                                     |
|                         | pentadecanoate (15:0)      | <a href="#">C16537</a> | <a href="#">HMDB00826</a> | 1.14                                         | 1.52                              | 1.34                          | 0.78                                                    | 1.42                                         | 1.83                                     | 1.35                                                    | 1.75                                         | 1.3                                      |
|                         | palmitate (16:0)           | <a href="#">C00249</a> | <a href="#">HMDB00220</a> | 1.1                                          | 1.26                              | 1.14                          | 0.94                                                    | 1.54                                         | 1.64                                     | 1.26                                                    | 1.63                                         | 1.29                                     |
|                         | palmitoleate (16:1n7)      | <a href="#">C08362</a> | <a href="#">HMDB03229</a> | 0.93                                         | 1.13                              | 1.22                          | 0.67                                                    | 1.35                                         | 2                                        | 0.92                                                    | 1.73                                         | 1.89                                     |
|                         | margarate (17:0)           |                        | <a href="#">HMDB02259</a> | 1.08                                         | 1.38                              | 1.27                          | 0.98                                                    | 1.53                                         | 1.57                                     | 1.36                                                    | 1.53                                         | 1.12                                     |
|                         | 10-heptadecenoate (17:1n7) |                        | <a href="#">HMDB60038</a> | 1.17                                         | 1.11                              | 0.95                          | 0.77                                                    | 1.44                                         | 1.87                                     | 1.21                                                    | 1.72                                         | 1.42                                     |
|                         | stearate (18:0)            | <a href="#">C01530</a> | <a href="#">HMDB00827</a> | 1.15                                         | 1.37                              | 1.19                          | 1.04                                                    | 1.57                                         | 1.51                                     | 1.42                                                    | 1.69                                         | 1.19                                     |
|                         | oleate (18:1n9)            | <a href="#">C00712</a> | <a href="#">HMDB00207</a> | 0.99                                         | 1.24                              | 1.25                          | 0.87                                                    | 1.56                                         | 1.8                                      | 0.84                                                    | 1.46                                         | 1.74                                     |
|                         | cis-vaccenate (18:1n7)     | <a href="#">C08367</a> | <a href="#">HMDB03231</a> | 0.88                                         | 1.12                              | 1.27                          | 0.96                                                    | 1.63                                         | 1.7                                      | 1.06                                                    | 1.87                                         | 1.77                                     |
|                         | nonadecanoate (19:0)       | <a href="#">C16535</a> | <a href="#">HMDB00772</a> | 1.12                                         | 1.41                              | 1.26                          | 1.05                                                    | 1.52                                         | 1.45                                     | 1.42                                                    | 1.75                                         | 1.23                                     |
|                         | 10-nonadecenoate (19:1n9)  |                        | <a href="#">HMDB13622</a> | 1.08                                         | 1.2                               | 1.1                           | 0.78                                                    | 1.38                                         | 1.77                                     | 1.11                                                    | 1.72                                         | 1.54                                     |
|                         | arachidate (20:0)          | <a href="#">C06425</a> | <a href="#">HMDB02212</a> | 1.48                                         | 1.81                              | 1.22                          | 0.89                                                    | 1.55                                         | 1.74                                     | 1.63                                                    | 1.82                                         | 1.11                                     |
|                         | eicosenoate (20:1n9 or 11) |                        | <a href="#">HMDB02231</a> | 1.11                                         | 1.2                               | 1.08                          | 0.89                                                    | 1.52                                         | 1.71                                     | 1.16                                                    | 1.96                                         | 1.69                                     |
|                         | erucate (22:1n9)           | <a href="#">C08316</a> | <a href="#">HMDB02068</a> | 1.5                                          | 1.52                              | 1.02                          | 0.78                                                    | 1.25                                         | 1.6                                      | 1.12                                                    | 1.82                                         | 1.62                                     |

Red boxes indicate statistically-significant up-regulation (p<0.05).  
 Inter-group comparisons performed by Welch's two sample t-test.  
 KEGG; Kyoto Encyclopedia of Genes and Genomes



**Supplementary Table E9:** Differences in amino acid levels between ASMCs from healthy non-smokers, healthy smokers and patients with COPD (fold-change)

| Super Pathway | Biochemical Name       | KEGG number               | HMDB number               | Healthy smokers vs. Healthy non-smokers (0h) | COPD vs. Healthy non-smokers (0h) | COPD vs. Healthy smokers (0h) | Healthy smokers vs. Healthy non-smokers untreated (48h) | COPD vs. Healthy non-smokers untreated (48h) | COPD vs. Healthy smokers untreated (48h) | Healthy smokers vs. Healthy non-smokers TGF-β/FBS (48h) | COPD vs. Healthy non-smokers TGF-β/FBS (48h) | COPD vs. Healthy smokers TGF-β/FBS (48h) |
|---------------|------------------------|---------------------------|---------------------------|----------------------------------------------|-----------------------------------|-------------------------------|---------------------------------------------------------|----------------------------------------------|------------------------------------------|---------------------------------------------------------|----------------------------------------------|------------------------------------------|
| Amino Acid    | glycine                | <a href="#">C00037</a>    | <a href="#">HMDB00123</a> | 1.12                                         | 1.79                              | 1.6                           | 1.56                                                    | 1.8                                          | 1.15                                     | 0.93                                                    | 1.23                                         | 1.33                                     |
|               | serine                 | <a href="#">C00065</a>    | <a href="#">HMDB00187</a> | 0.75                                         | 0.97                              | 1.3                           | 0.63                                                    | 0.92                                         | 1.46                                     | 0.91                                                    | 1.26                                         | 1.38                                     |
|               | threonine              | <a href="#">C00188</a>    | <a href="#">HMDB00167</a> | 0.85                                         | 1.25                              | 1.46                          | 0.76                                                    | 1.19                                         | 1.57                                     | 1.01                                                    | 1.53                                         | 1.51                                     |
|               | alanine                | <a href="#">C00041</a>    | <a href="#">HMDB00161</a> | 0.61                                         | 0.82                              | 1.34                          | 0.46                                                    | 0.68                                         | 1.47                                     | 0.75                                                    | 0.99                                         | 1.33                                     |
|               | aspartate              | <a href="#">C00049</a>    | <a href="#">HMDB00191</a> | 0.88                                         | 1.15                              | 1.3                           | 0.97                                                    | 1.34                                         | 1.39                                     | 1.14                                                    | 1.52                                         | 1.34                                     |
|               | asparagine             | <a href="#">C00152</a>    | <a href="#">HMDB00168</a> | 0.68                                         | 0.92                              | 1.36                          | 0.54                                                    | 0.78                                         | 1.46                                     | 0.8                                                     | 1.08                                         | 1.34                                     |
|               | glutamine              | <a href="#">C00064</a>    | <a href="#">HMDB00641</a> | 1.03                                         | 1.44                              | 1.39                          | 0.94                                                    | 1.4                                          | 1.49                                     | 1.1                                                     | 1.57                                         | 1.43                                     |
|               | histidine              | <a href="#">C00135</a>    | <a href="#">HMDB00177</a> | 0.81                                         | 1.11                              | 1.38                          | 0.71                                                    | 0.99                                         | 1.39                                     | 0.94                                                    | 1.41                                         | 1.5                                      |
|               | lysine                 | <a href="#">C00047</a>    | <a href="#">HMDB00182</a> | 0.8                                          | 1.05                              | 1.31                          | 0.61                                                    | 0.91                                         | 1.5                                      | 1.23                                                    | 1.62                                         | 1.32                                     |
|               | phenylalanine          | <a href="#">C00079</a>    | <a href="#">HMDB00159</a> | 0.82                                         | 1.07                              | 1.3                           | 0.78                                                    | 1.03                                         | 1.32                                     | 0.95                                                    | 1.36                                         | 1.43                                     |
|               | tyrosine               | <a href="#">C00082</a>    | <a href="#">HMDB00158</a> | 0.83                                         | 1.11                              | 1.33                          | 0.79                                                    | 1.06                                         | 1.34                                     | 0.97                                                    | 1.4                                          | 1.44                                     |
|               | tryptophan             | <a href="#">C00078</a>    | <a href="#">HMDB00929</a> | 0.84                                         | 1.13                              | 1.35                          | 0.81                                                    | 1.08                                         | 1.33                                     | 0.99                                                    | 1.41                                         | 1.43                                     |
|               | leucine                | <a href="#">C00123</a>    | <a href="#">HMDB00687</a> | 0.77                                         | 1.01                              | 1.32                          | 0.72                                                    | 0.97                                         | 1.34                                     | 0.95                                                    | 1.34                                         | 1.41                                     |
|               | isoleucine             | <a href="#">C00407</a>    | <a href="#">HMDB00172</a> | 0.89                                         | 1.15                              | 1.28                          | 0.86                                                    | 1.09                                         | 1.26                                     | 1.04                                                    | 1.44                                         | 1.38                                     |
|               | valine                 | <a href="#">C00183</a>    | <a href="#">HMDB00883</a> | 0.8                                          | 1.03                              | 1.28                          | 0.78                                                    | 1.01                                         | 1.3                                      | 0.98                                                    | 1.38                                         | 1.41                                     |
|               | methionine             | <a href="#">C00073</a>    | <a href="#">HMDB00696</a> | 0.7                                          | 0.91                              | 1.3                           | 0.63                                                    | 0.89                                         | 1.42                                     | 0.95                                                    | 1.4                                          | 1.48                                     |
|               | cysteine               | <a href="#">C00097</a>    | <a href="#">HMDB00574</a> | 0.98                                         | 1.59                              | 1.62                          | 1.33                                                    | 1.34                                         | 1.01                                     | 0.9                                                     | 1.25                                         | 1.39                                     |
| arginine      | <a href="#">C00062</a> | <a href="#">HMDB00517</a> | 0.74                      | 1.01                                         | 1.36                              | 0.6                           | 0.85                                                    | 1.43                                         | 0.91                                     | 1.37                                                    | 1.5                                          |                                          |
| proline       | <a href="#">C00148</a> | <a href="#">HMDB00162</a> | 0.78                      | 1.06                                         | 1.36                              | 2.45                          | 3.77                                                    | 1.54                                         | 0.93                                     | 1.3                                                     | 1.39                                         |                                          |

Red boxes indicate statistically-significant up-regulation (p<0.05).

Comparisons performed by Welch's two sample t-test.

KEGG; Kyoto Encyclopedia of Genes and Genomes

HMDB; The Human Metabolome Database
